# Supplementary material
Source: publisher site journal article supplement (https://www.spandidos-publications.com/2509/downloadSupplementary)
Supplement: Supplementary file 1 [file downloadSupplementary]

## Sheet: Sheet1
Table S1.
A. Upregulated proteins in K562IR exosomes
Protein names	Protein IDs	Gene names	Fold change	Unique peptides	MS/MS Count	Permutation-based FDR
Interferon-induced transmembrane protein 3	Q01628	IFITM3	87.5	1	24	<0.001
Angiotensin-converting enzyme; Angiotensin-converting enzyme, soluble form	P12821	ACE	22.9	7	18	0.052
Endothelial cell-selective adhesion molecule	Q96AP7	ESAM	11.8	9	31	0.008
Desmoglein-2	Q14126	DSG2	10.9	10	33	0.002
Cell surface glycoprotein MUC18	P43121	MCAM	9.6	11	28	<0.001
Neurofascin	O94856	NFASC	8.9	25	64	0.013
Platelet glycoprotein 4	P16671	CD36	8.4	7	18	0.005
Unconventional myosin-Id	O94832	MYO1D	7.6	21	41	0.004
Interferon-induced transmembrane protein 1	P13164	IFITM1	7.2	1	22	0.04
CD2-associated protein	Q9Y5K6	CD2AP	6.7	29	105	0.004
Charged multivesicular body protein 1b	Q7LBR1	CHMP1B	6.4	4	16	0.007
Copine-8	Q86YQ8; Q9HCH3; Q8IYJ1	CPNE8	6.4	12	42	0.008
Band 4,1-like protein 3; Band 4,1-like protein 3, N-terminally processed	Q9Y2J2	EPB41L3	6.4	32	134	0.01
Transmembrane emp24 domain-containing protein 10	P49755	TMED10	6.2	4	9	0.02
Multivesicular body subunit 12A	Q96EY5	MVB12A	6.2	2	19	0.001
Sorbitol dehydrogenase	Q00796	SORD	6.1	4	13	0.006
Golgi integral membrane protein 4	O00461	GOLIM4	6	18	37	<0.001
Protein TFG	Q92734	TFG	5.9	3	9	<0.001
Melanoma-associated antigen 4	P43358	MAGEA4	5.9	9	20	<0.001
Spastin	Q9UBP0	SPAST	5.7	9	19	<0.001
E3 ubiquitin-protein ligase CHIP	Q9UNE7	STUB1	5.6	8	18	0.009
Intercellular adhesion molecule 2	P13598	ICAM2	5.6	6	18	0.009
Galectin-1	P09382	LGALS1	5.4	4	16	0.007
Tripeptidyl-peptidase 1	Q5IS74; O14773	TPP1	5.4	3	11	0.023
Voltage-dependent calcium channel subunit α-2/δ-2; Voltage-dependent calcium channel subunit α-2-2; Voltage-dependent calcium channel subunit δ-2	Q9NY47	CACNA2D2	5.3	10	28	0.006
Coiled-coil domain-containing protein 50	Q8IVM0	CCDC50	5.2	11	37	0.015
Serine/threonine-protein kinase PAK 2; PAK-2p27; PAK-2p34	Q13177; O75914; Q13153	PAK2	5.2	11	21	0.011
Immunoglobulin superfamily member 8	Q969P0	IGSF8	5.1	16	72	0.012
Melanotransferrin	P08582	MFI2	5.1	10	19	<0.001
Ankyrin-1	P16157	ANK1	4.9	36	110	0.006
Charged multivesicular body protein 4a	Q9BY43	CHMP4A	4.8	9	35	0.001
Lamin-B1	P20700	LMNB1	4.6	16	40	0.137
Tetraspanin-18	Q96SJ8	TSPAN18	4.6	3	13	0.003
Golgi apparatus protein 1	Q92896	GLG1	4.6	21	52	0.021
BRO1 domain-containing protein BROX	Q5VW32	BROX	4.3	7	11	0.055
CD59 glycoprotein	P13987	CD59	4.3	8	75	0.004
Tubulin β-2B chain	Q9BVA1	TUBB2B	4.2	2	16	0.019
Rab11 family-interacting protein 1	Q6WKZ4	RAB11FIP1	4.1	16	37	0.003
Dolichyl-diphosphooligosaccharide--protein glycosyltransferase subunit 1	P04843	RPN1	4.1	18	45	0.031
Protein EFR3 homolog A	Q14156	EFR3A	4.1	9	25	0.011
STAM-binding protein	O95630	STAMBP	4.1	9	16	0.003
Endophilin-A2	Q99961; Q99962	SH3GL1	4.1	10	37	0.006
Platelet glycoprotein Ibβ chain	P13224	GP1BB	4.1	9	75	0.024
Carboxypeptidase D	O75976	CPD	4	20	35	0.014
Erythroid membrane-associated protein	Q96PL5	ERMAP	4	10	17	0.009
Na(+)/H(+) exchange regulatory cofactor NHE-RF2	Q15599	SLC9A3R2	3.9	16	47	0.022
Rac GTPase-activating protein 1	Q9H0H5	RACGAP1	3.8	10	18	0.002
Protein disulfide-isomerase A4	P13667	PDIA4	3.8	13	22	0.05
Hepatocyte growth factor-regulated tyrosine kinase substrate	O14964	HGS	3.8	15	45	0.003
Protein tweety homolog 2	Q9BSA4	TTYH2	3.7	3	13	0.002
Tetratricopeptide repeat protein 1	Q99614	TTC1	3.7	4	11	0.004
UV excision repair protein RAD23 homolog B	P54727	RAD23B	3.7	6	16	0.04
Peroxiredoxin-4	Q13162	PRDX4	3.7	7	25	0.051
Toll-interacting protein	Q9H0E2	TOLLIP	3.7	4	24	0.002
Amyloid-like protein 2	Q06481	APLP2	3.6	14	46	0.011
Synaptotagmin-like protein 4	Q96C24	SYTL4	3.6	16	48	0.005
Sodium/myo-inositol cotransporter	P53794	SLC5A3	3.6	6	13	0.022
Vacuolar protein sorting-associated protein 4A	Q9UN37	VPS4A	3.6	11	76	<0.001
3-oxo-5-β-steroid 4-dehydrogenase	P51857	AKR1D1	3.6	3	10	0.164
Syntenin-1	O00560	SDCBP	3.6	22	207	<0.001
Hemoglobin subunit ε	P02100	HBE1	3.6	11	56	<0.001
Synaptosomal-associated protein 29	O95721	SNAP29	3.5	13	40	0.121
Leucine-rich PPR motif-containing protein, mitochondrial	P42704	LRPPRC	3.5	33	68	0.221
Membrane-associated progesterone receptor component 1	O00264; O15173	PGRMC1	3.5	4	9	0.005
Disks large homolog 1	Q12959; Q15700; P78352	DLG1	3.5	14	23	0.024
Nucleoside diphosphate kinase A	P15531	NME1	3.4	2	14	0.082
Exocyst complex component 3-like protein 2	Q2M3D2	EXOC3L2	3.4	14	36	0.036
Microtubule-associated protein RP/EB family member 1	Q15691	MAPRE1	3.4	7	19	0.046
Integral membrane protein 2A	O43736	ITM2A	3.4	19	101	0.11
Charged multivesicular body protein 4b	Q9H444	CHMP4B	3.3	15	86	<0.001
Phosphatidylinositol 4-kinase α	P42356; A4QPH2; Q8N8J0	PI4KA	3.3	25	51	0.047
Keratin, type I cytoskeletal 18	P05783	KRT18	3.3	7	13	0.062
Unconventional myosin-XVIIIa	Q92614	MYO18A	3.3	26	41	0.05
S-formylglutathione hydrolase	P10768	ESD	3.3	8	29	0.078
Activator of 90 kDa heat shock protein ATPase homolog 1	O95433	AHSA1	3.3	6	10	0.086
Reelin	P78509	RELN	3.2	90	485	0.271
Importin subunit α-1	P52292	KPNA2	3.2	7	32	0.07
Junction plakoglobin	P14923	JUP	3.2	20	82	0.028
Calcium-regulated heat stable protein 1	Q9Y2V2	CARHSP1	3.2	9	21	0.105
Receptor-type tyrosine-protein phosphatase S	Q13332	PTPRS	3.1	17	52	0.029
Catenin δ-1	O60716	CTNND1	3.1	16	37	0.042
DnaJ homolog subfamily A member 1	P31689	DNAJA1	3.1	17	58	0.029
ELAV-like protein 1	Q15717; Q12926; P26378	ELAVL1	3.1	13	36	0.032
Tubulin-specific chaperone A	O75347	TBCA	3.1	8	29	0.333
Porphobilinogen deaminase	P08397	HMBS	3.1	15	28	0.16
Receptor-type tyrosine-protein phosphatase η	Q12913	PTPRJ	3	8	17	0.007
Vacuolar protein sorting-associated protein 4B	O75351	VPS4B	3	7	25	0.093
RNA-binding motif protein, X chromosome; RNA-binding motif protein, X chromosome, N-terminally processed; RNA binding motif protein, X-linked-like-1	P38159; Q96E39; O75526; Q8IZ40; Q8N7X1	RBMX; RBMXL1	3	11	39	0.142
Heat shock 70 kDa protein 6; Putative heat shock 70 kDa protein 7	P17066; P48741	HSPA6; HSPA7	3	2	31	0.4
Rho guanine nucleotide exchange factor 10	O15013	ARHGEF10	3	7	14	0.011
Receptor-type tyrosine-protein phosphatase F	P10586	PTPRF	3	14	35	0.028
Programmed cell death 6-interacting protein	Q8WUM4	PDCD6IP	3	76	552	0.004
Crk-like protein	P46109	CRKL	3	12	56	<0.001
Perilipin-3	O60664	PLIN3	2.9	7	23	0.151
Hemoglobin subunit δ	P02042	HBD	2.9	3	28	0.046
Myeloid cell surface antigen CD33	P20138	CD33	2.9	4	13	0.271
Transcription elongation factor SPT5	O00267	SUPT5H	2.8	11	18	0.106
Ubiquitin-conjugating enzyme E2 L3	P68036; A0A1B0GUS4	UBE2L3	2.8	14	84	0.121
Ataxin-10	Q9UBB4	ATXN10	2.8	7	14	0.013
Peptidyl-prolyl cis-trans isomerase FKBP3	Q00688	FKBP3	2.8	7	12	0.131
Syntaxin-binding protein 2	Q15833	STXBP2	2.8	25	84	0.029
Target of Myb protein 1	O60784	TOM1	2.8	10	39	0.006
Lysosome-associated membrane glycoprotein 1	P11279	LAMP1	2.8	7	28	0.319
Fumarate hydratase, mitochondrial	P07954	FH	2.8	12	31	0.277
Phosphoenolpyruvate carboxykinase [GTP], mitochondrial	Q16822; P35558	PCK2	2.8	16	27	0.099
Guanine nucleotide-binding protein G(I)/G(S)/G(O) subunit γ-12	Q9UBI6	GNG12	2.8	5	7	0.026
Platelet-activating factor acetylhydrolase IB subunit γ	Q15102	PAFAH1B3	2.8	5	20	0.044
Serpin B6	P35237; P50452	SERPINB6	2.8	4	12	0.124
Heat shock 70 kDa protein 1-like	P34931	HSPA1L	2.7	4	29	0.334
Tetraspanin-13	O95857; Q12999	TSPAN13	2.7	4	24	0.211
DnaJ homolog subfamily C member 7	Q99615	DNAJC7	2.7	12	29	0.011
Exocyst complex component 6	Q8TAG9; Q9Y2D4	EXOC6	2.7	8	14	0.022
Exocyst complex component 3	O60645	EXOC3	2.7	9	15	0.049
Heterogeneous nuclear ribonucleoprotein A0	Q13151	HNRNPA0	2.7	8	16	0.106
L-aminoadipate-semialdehyde dehydrogenase-phosphopantetheinyl transferase	Q9NRN7	AASDHPPT	2.6	6	10	0.002
Putative heat shock protein HSP 90-β 2	Q58FF8	HSP90AB2P	2.6	2	38	0.122
Podocalyxin	O00592	PODXL	2.6	11	44	0.271
Ras GTPase-activating protein-binding protein 1	Q13283	G3BP1	2.6	11	51	0.017
Complement decay-accelerating factor	P08174	CD55	2.6	9	36	0.013
Nucleoside diphosphate kinase B	P22392; O60361	NME2	2.6	5	55	0.089
Polypyrimidine tract-binding protein 1	P26599	PTBP1	2.6	14	52	0.142
Prosaposin; Saposin-A; Saposin-B-Val; Saposin-B; Saposin-C; Saposin-D	P07602	PSAP	2.6	7	10	0.118
Exocyst complex component 1	Q9NV70	EXOC1	2.6	7	16	0.104
Midkine	P21741	MDK	2.6	11	66	0.231
Exocyst complex component 4	Q96A65	EXOC4	2.6	16	43	0.006
Septin-5	Q99719	2005-09-01	2.6	11	38	0.117
Growth factor receptor-bound protein 2	P62993	GRB2	2.5	10	24	0.089
Charged multivesicular body protein 2a	O43633	CHMP2A	2.5	9	43	0.004
Ubiquilin-1	Q9UMX0	UBQLN1	2.5	1	10	0.097
TRAF2 and NCK-interacting protein kinase	Q9UKE5	TNIK	2.5	16	54	0.027
Drebrin	Q16643	DBN1	2.5	5	17	0.045
Serine/threonine-protein phosphatase 5	P53041	PPP5C	2.5	7	19	0.008
Kinesin-like protein KIF23	Q02241	KIF23	2.5	8	16	0.105
Immunoglobulin superfamily member 3	O75054	IGSF3	2.5	21	51	0.014
Palmitoyltransferase ZDHHC5	Q9C0B5	ZDHHC5	2.5	15	47	0.151
Glutamate dehydrogenase 1, mitochondrial; Glutamate dehydrogenase 2, mitochondrial	P00367; P49448	GLUD1; GLUD2	2.5	10	20	0.163
Signal transducing adapter molecule 1	Q92783	STAM	2.5	9	32	0.04
Scaffold attachment factor B1; Scaffold attachment factor B2	Q15424; Q14151	SAFB; SAFB2	2.5	8	18	0.038
Isocitrate dehydrogenase [NADP], mitochondrial	P48735	IDH2	2.5	8	21	0.085
Charged multivesicular body protein 1a	Q9HD42	CHMP1A	2.4	6	15	0.143
Acetyl-CoA acetyltransferase, mitochondrial	P24752	ACAT1	2.4	8	21	0.308
Aspartate aminotransferase, cytoplasmic	P17174	GOT1	2.4	12	45	0.319
Tyrosine-protein phosphatase non-receptor type 23	Q9H3S7	PTPN23	2.4	20	30	0.206
Protein kinase C and casein kinase substrate in neurons protein 2	Q9UNF0	PACSIN2	2.4	9	9	0.075
Src substrate cortactin	Q14247	CTTN	2.4	13	23	0.25
Exocyst complex component 7	Q9UPT5	EXOC7	2.4	17	25	0.215
Tumor protein D54	O43399	TPD52L2	2.4	7	12	0.095
Cysteine and histidine-rich domain-containing protein 1	Q9UHD1	CHORDC1	2.4	4	14	0.004
Catalase	P04040	CAT	2.4	20	62	0.151
Cytochrome c	P99999	CYCS	2.4	4	43	0.272
Plasminogen activator inhibitor 1 RNA-binding protein	Q8NC51	SERBP1	2.4	12	27	0.174
Hemoglobin subunit α	P69905	HBA1	2.4	5	35	0.108
Tropomyosin α-3 chain	P06753	TPM3	2.4	5	34	0.249
Calcium-transporting ATPase type 2C member 1	P98194	ATP2C1	2.4	11	22	0.035
Vacuolar protein sorting-associated protein 37B	Q9H9H4	VPS37B	2.4	8	22	0.281
Leukocyte surface antigen CD47	Q08722	CD47	2.4	4	17	0.21
MIT domain-containing protein 1	Q8WV92	MITD1	2.3	5	18	0.16
ATP-dependent RNA helicase DDX19A; ATP-dependent RNA helicase DDX19B	Q9NUU7; Q9UMR2	DDX19A; DDX19B	2.3	7	28	0.032
Filamin-B	O75369	FLNB	2.3	39	94	0.083
Thymosin β-4; Hematopoietic system regulatory peptide	P62328	TMSB4X	2.3	3	13	0.163
Peroxiredoxin-6	P30041	PRDX6	2.3	15	85	0.012
Deoxyuridine 5-triphosphate nucleotidohydrolase, mitochondrial	P33316; P14597	DUT	2.3	6	23	0.106
Heparan sulfate 2-O-sulfotransferase 1	Q7LGA3	HS2ST1	2.3	5	13	0.044
Voltage-dependent anion-selective channel protein 2	P45880	VDAC2	2.3	7	33	0.353
Glutathione reductase, mitochondrial	P00390	GSR	2.3	6	12	0.101
BAG family molecular chaperone regulator 5	Q9UL15	BAG5	2.3	8	13	0.032
Vesicular integral-membrane protein VIP36	Q12907	LMAN2	2.3	9	17	0.188
Lamina-associated polypeptide 2, isoformsβ/γ; Thymopoietin; Thymopentin	P42167	TMPO	2.3	6	51	0.17
Ubiquitin carboxyl-terminal hydrolase 10	Q14694	USP10	2.3	6	18	0.078
Matrin-3	P43243	MATR3	2.3	28	126	0.014
Hemoglobin subunit ζ	P02008	HBZ	2.3	13	217	0.001
Nuclear pore membrane glycoprotein 210	Q8TEM1	NUP210	2.3	8	14	0.074
Brain-specific angiogenesis inhibitor 1-associated protein 2	Q9UQB8	BAIAP2	2.3	16	41	0.111
Testisin	Q9Y6M0	PRSS21	2.3	2	8	0.079
Hsc70-interacting protein; Putative protein FAM10A4; Putative protein FAM10A5	P50502; Q8IZP2; Q8NFI4	ST13; ST13P4; ST13P5	2.3	10	63	0.043
2,3-cyclic-nucleotide 3-phosphodiesterase	P09543	CNP	2.3	18	41	0.18
IST1 homolog	P53990	IST1	2.3	13	63	0.003
Glucosidase 2 subunit β	P14314	PRKCSH	2.2	5	21	0.202
Nuclear transport factor 2	P61970	NUTF2	2.2	3	11	0.319
Far upstream element-binding protein 2	Q92945	KHSRP	2.2	20	72	0.089
Cellular nucleic acid-binding protein	P62633	CNBP	2.2	3	12	0.194
Protein δ homolog 1; Fetal antigen 1	P80370	DLK1	2.2	4	11	0.239
Sorting nexin-6; Sorting nexin-6, N-terminally processed	Q9UNH7	SNX6	2.2	13	26	0.164
RNA-binding protein 14	Q96PK6	RBM14	2.2	7	17	0.201
Cell division cycle 5-like protein	Q99459	CDC5L	2.2	11	18	0.077
Neuroblast differentiation-associated protein AHNAK	Q09666	AHNAK	2.2	57	136	0.007
Non-POU domain-containing octamer-binding protein	Q15233	NONO	2.2	9	31	0.184
Tumor susceptibility gene 101 protein	Q99816	TSG101	2.2	15	67	0.143
Lysyl oxidase homolog 4	Q96JB6	LOXL4	2.2	8	25	0.241
Charged multivesicular body protein 5	Q9NZZ3	CHMP5	2.2	6	44	0.012
Calpain-1 catalytic subunit	P07384	CAPN1	2.2	8	28	0.103
Vacuolar protein sorting-associated protein VTA1 homolog	Q9NP79	VTA1	2.2	8	39	0.077
γ-soluble NSF attachment protein	Q99747	NAPG	2.2	6	16	0.052
Creatine kinase B-type	P12277	CKB	2.2	20	119	0.011
Zinc finger Ran-binding domain-containing protein 2	O95218	ZRANB2	2.2	4	9	0.042
Peroxisomal multifunctional enzyme type 2; (3R)-hydroxyacyl-CoA dehydrogenase; Enoyl-CoA hydratase 2	P51659	HSD17B4	2.2	8	19	0.075
Glutaredoxin-3	O76003	GLRX3	2.2	8	17	0.128
ADP/ATP translocase 2; ADP/ATP translocase 2, N-terminally processed	P05141	SLC25A5	2.2	3	29	0.452
DnaJ homolog subfamily C member 2; DnaJ homolog subfamily C member 2, N-terminally processed	Q99543	DNAJC2	2.2	9	18	0.052
Guanine nucleotide-binding protein subunit α-11	P29992; O95837	GNA11	2.1	5	14	0.003
Scavenger receptor class B member 1	Q8WTV0	SCARB1	2.1	5	21	0.091
D-dopachrome decarboxylase; D-dopachrome decarboxylase-like protein	P30046; A6NHG4	DDT; DDTL	2.1	6	15	0.108
DNA replication licensing factor MCM7	P33993	MCM7	2.1	27	72	0.031
Proteasome subunit α type-6	P60900	PSMA6	2.1	7	12	0.259
Exocyst complex component 2	Q96KP1	EXOC2	2.1	10	23	0.146
Far upstream element-binding protein 1	Q96AE4	FUBP1	2.1	8	19	0.19
Protein NDRG2	Q9UN36	NDRG2	2.1	4	12	0.06
Ubiquitin thioesterase OTU1	Q5VVQ6	YOD1	2.1	6	11	0.082
Insulin-like growth factor 2 mRNA-binding protein 1	Q9NZI8	IGF2BP1	2.1	25	116	0.015
Stress-induced-phosphoprotein 1	P31948	STIP1	2.1	35	149	0.165
Ribonuclease inhibitor	P13489	RNH1	2.1	8	43	0.212
CD81 antigen	P60033	CD81	2.1	7	106	0.326
Leucine-rich repeat-containing protein 59	Q96AG4	LRRC59	2.1	11	34	0.025
CD9 antigen	P21926	CD9	2.1	11	45	0.357
Protein lin-7 homolog C	Q9NUP9; O14910	LIN7C	2.1	7	35	0.101
Na(+)/H(+) exchange regulatory cofactor NHE-RF1	O14745	SLC9A3R1	2	23	98	0.156
Rho GDP-dissociation inhibitor 1	P52565	ARHGDIA	2	4	26	0.055
BMP and activin membrane-bound inhibitor homolog	Q13145	BAMBI	2	3	6	0.061
Sorting nexin-2	O60749	SNX2	2	5	15	0.028
Endoplasmic reticulum resident protein 29	P30040	ERP29	2	9	26	0.278
Ras-related protein Rab-11B; Ras-related protein Rab-11A	Q15907; P62491; P57735	RAB11B; RAB11A	2	13	61	0.132
Sorting nexin-27	Q96L92	SNX27	2	4	13	0.16
Peptidyl-prolyl cis-trans isomerase FKBP4; Peptidyl-prolyl cis-trans isomerase FKBP4, N-terminally processed	Q02790	FKBP4	2	11	32	0.152
MAGUK p55 subfamily member 6	Q9NZW5; REV__Q8N884	MPP6	2	25	97	0.115
DnaJ homolog subfamily B member 1	P25685	DNAJB1	2	14	41	0.019
Heat shock protein 105 kDa	Q92598	HSPH1	2	19	79	<0.001
Non-receptor tyrosine-protein kinase TYK2	P29597	TYK2	2	5	9	0.047
Phosphoribosylformylglycinamidine synthase	O15067	PFAS	2	20	59	0.338
Methionine adenosyltransferase 2 subunit β	Q9NZL9	MAT2B	2	8	20	0.232
Oxysterol-binding protein 1	P22059	OSBP	2	8	22	0.058
ADP-ribosylation factor-like protein 8B; ADP-ribosylation factor-like protein 8A	Q9NVJ2; Q96BM9	ARL8B; ARL8A	2	4	13	0.21
Dynactin subunit 2	Q13561	DCTN2	2	7	22	0.08
Cell cycle and apoptosis regulator protein 2	Q8N163	CCAR2	2	9	26	0.069
Nucleobindin-1	Q02818	NUCB1	2	12	31	0.172
CD44 antigen	P16070	CD44	2	3	12	0.368
Elongation factor Tu, mitochondrial	P49411	TUFM	2	19	59	0.466
Heterogeneous nuclear ribonucleoproteins A2/B1	P22626	HNRNPA2B1	2	20	130	0.285
Flap endonuclease 1	P39748	FEN1	2	14	39	0.042
ATP-binding cassette sub-family F member 2	Q9UG63	ABCF2	2	5	17	0.122
U2 small nuclear ribonucleoprotein A	P09661	SNRPA1	2	8	30	0.129
Polypeptide N-acetylgalactosaminyltransferase 2; Polypeptide N-acetylgalactosaminyltransferase 2 soluble form	Q10471	GALNT2	1.9	12	37	0.058
Serine/threonine-protein kinase PAK 4	O96013	PAK4	1.9	15	41	0.304
60S acidic ribosomal protein P1	P05386	RPLP1	1.9	4	18	0.092
Fructose-bisphosphate aldolase C	P09972; P05062	ALDOC	1.9	10	47	0.114
Serine/threonine-protein kinase VRK1	Q99986	VRK1	1.9	6	17	0.022
Protein arginine N-methyltransferase 5; Protein arginine N-methyltransferase 5, N-terminally processed	O14744	PRMT5	1.9	13	53	0.161
Prostaglandin F2 receptor negative regulator	Q9P2B2	PTGFRN	1.9	36	200	0.099
Nascent polypeptide-associated complex subunit α; Nascent polypeptide-associated complex subunit α, muscle-specific form	Q13765; E9PAV3; Q9BZK3	NACA	1.9	4	11	0.167
Protein disulfide-isomerase A6	Q15084	PDIA6	1.9	15	51	0.358
Synaptic vesicle membrane protein VAT-1 homolog	Q99536	VAT1	1.9	10	38	0.106
Tyrosine--tRNA ligase, cytoplasmic; Tyrosine--tRNA ligase, cytoplasmic, N-terminally processed	P54577	YARS	1.9	22	54	0.271
Tryptophan--tRNA ligase, cytoplasmic; T1-TrpRS; T2-TrpRS	P23381	WARS	1.9	23	119	0.081
Macrophage migration inhibitory factor	P14174	MIF	1.9	2	18	0.461
Tyrosine-protein kinase Fyn	P06241; P06239; P09769	FYN	1.9	4	12	0.073
Transferrin receptor protein 1; Transferrin receptor protein 1, serum form	P02786	TFRC	1.9	45	325	0.02
Peptidyl-prolyl cis-trans isomerase B	P23284	PPIB	1.9	9	50	0.022
Acidic leucine-rich nuclear phosphoprotein 32 family member B	Q92688	ANP32B	1.9	5	9	0.33
Signal recognition particle receptor subunit β	Q9Y5M8	SRPRB	1.9	7	10	0.15
UMP-CMP kinase	P30085	CMPK1	1.9	7	32	0.081
Sorting nexin-3	O60493	SNX3	1.9	7	16	0.024
Hsp90 co-chaperone Cdc37; Hsp90 co-chaperone Cdc37, N-terminally processed	Q16543	CDC37	1.9	10	38	0.115
Farnesyl pyrophosphate synthase	P14324	FDPS	1.9	3	10	0.171
Heterogeneous nuclear ribonucleoprotein D-like	O14979	HNRNPDL	1.9	7	21	0.24
Microtubule-associated proteins 1A/1B light chain 3B; Microtubule-associated proteins 1A/1B light chain 3β 2	Q9GZQ8; A6NCE7; Q9H492	MAP1LC3B; MAP1LC3B2	1.9	4	15	0.519
Eukaryotic translation initiation factor 5	P55010	EIF5	1.9	7	25	0.042
Inosine-5-monophosphate dehydrogenase 2	P12268	IMPDH2	1.9	15	77	0.004
EH domain-containing protein 1	Q9H4M9	EHD1	1.9	28	191	0.055
Eukaryotic translation initiation factor 3 subunit J	O75822	EIF3J	1.9	5	21	0.07
Dedicator of cytokinesis protein 11	Q5JSL3	DOCK11	1.9	18	32	0.129
Serine/arginine repetitive matrix protein 2	Q9UQ35	SRRM2	1.9	14	35	0.136
Electron transfer flavoprotein subunit α, mitochondrial	P13804	ETFA	1.9	10	31	0.487
FACT complex subunit SPT16	Q9Y5B9	SUPT16H	1.9	17	40	0.18
Peptidyl-prolyl cis-trans isomerase A; Peptidyl-prolyl cis-trans isomerase A, N-terminally processed	P62937; P0DN26; A0A0B4J2A2; A0A075B767; A0A075B759; Q9Y536; F5H284; P0DN37	PPIA	1.9	20	232	0.22
γ-glutamyltranspeptidase 1; γ-glutamyltranspeptidase 1 heavy chain; γ-glutamyltranspeptidase 1 light chain; Putative γ-glutamyltranspeptidase 3; Putative γ-glutamyltranspeptidase 3 heavy chain; Putative γ-glutamyltranspeptidase 3 light chain; Inactive γ-glutamyltranspeptidase 2	P19440; A6NGU5; P36268; Q14390; B5MD39	GGT1; GGT3P; GGT2	1.8	7	26	0.484
Polyadenylate-binding protein 1; Polyadenylate-binding protein 3	P11940; Q9H361; Q4VXU2; Q96DU9	PABPC1; PABPC3	1.8	19	111	0.064
Charged multivesicular body protein 6	Q96FZ7	CHMP6	1.8	3	11	0.145
Poly(rC)-binding protein 2	Q15366; P57721	PCBP2	1.8	8	38	0.059
Integral membrane protein 2C; CT-BRI3	Q9NQX7	ITM2C	1.8	3	18	0.236
Actin-like protein 6A	O96019; O94805	ACTL6A	1.8	6	17	0.52
Eukaryotic translation initiation factor 4 γ 1	Q04637; O43432	EIF4G1	1.8	12	34	0.253
Splicing factor U2AF 65 kDa subunit	P26368	U2AF2	1.8	8	22	0.168
Ras-related protein Rab-35	Q15286	RAB35	1.8	6	13	0.156
Peptidyl-prolyl cis-trans isomerase NIMA-interacting 1	Q13526	PIN1	1.8	6	16	0.032
Splicing factor 3A subunit 1	Q15459	SF3A1	1.8	11	25	0.212
Peptidyl-prolyl cis-trans isomerase D	Q08752	PPID	1.8	4	8	0.096
Pyrroline-5-carboxylate reductase 1, mitochondrial	P32322	PYCR1	1.8	6	13	0.311
Transaldolase	P37837	TALDO1	1.8	10	32	0.319
RNA-binding protein FUS	P35637; Q92804	FUS	1.8	8	14	0.358
Electron transfer flavoprotein subunit β	P38117	ETFB	1.8	10	35	0.223
Insulin receptor; Insulin receptor subunit α; Insulin receptor subunit β	P06213	INSR	1.8	9	17	0.299
Hephaestin	Q9BQS7	HEPH	1.8	21	100	0.062
Endothelial protein C receptor	Q9UNN8	PROCR	1.8	3	19	0.291
Ubiquitin carboxyl-terminal hydrolase 7	Q93009	USP7	1.8	10	17	0.248
E3 ubiquitin-protein ligase NEDD4-like	Q96PU5	NEDD4L	1.8	14	50	0.028
Tyrosine-protein kinase transmembrane receptor ROR2	Q01974; Q01973	ROR2	1.8	8	24	0.17
GMP synthase [glutamine-hydrolyzing]	P49915	GMPS	1.8	25	80	0.169
Heterogeneous nuclear ribonucleoprotein A/B	Q99729	HNRNPAB	1.8	4	20	0.307
Ubiquitin-conjugating enzyme E2 N; Putative ubiquitin-conjugating enzyme E2 N-like	P61088; Q5JXB2	UBE2N; UBE2NL	1.7	7	29	0.368
Cleavage and polyadenylation specificity factor subunit 5	O43809	NUDT21	1.7	7	10	0.202
Mitochondrial import receptor subunit TOM34	Q15785	TOMM34	1.7	11	21	0.266
Ras-related protein Rap-2b	P61225	RAP2B	1.7	2	19	0.121
Hemoglobin subunit γ-1	P69891	HBG1	1.7	1	173	0.114
Oxygen-dependent coproporphyrinogen-III oxidase, mitochondrial	P36551	CPOX	1.7	11	26	0.187
Protein phosphatase 1F	P49593	PPM1F	1.7	13	60	0.162
Vimentin	P08670; P17661; P41219; Q16352; P07196; P07197	VIM	1.7	29	132	0.253
Eukaryotic translation initiation factor 4B	P23588	EIF4B	1.7	8	14	0.46
Phosphatidylethanolamine-binding protein 1; Hippocampal cholinergic neurostimulating peptide	P30086	PEBP1	1.7	14	55	0.339
Adenylate kinase isoenzyme 1	P00568; Q9Y6K8	AK1	1.7	6	9	0.21
Tubulin--tyrosine ligase-like protein 12	Q14166	TTLL12	1.7	15	49	0.002
Coronin-1C	Q9ULV4	CORO1C	1.7	24	112	0.052
78 kDa glucose-regulated protein	P11021	HSPA5	1.7	34	181	0.002
Neurosecretory protein VGF; Neuroendocrine regulatory peptide-1; Neuroendocrine regulatory peptide-2; Antimicrobial peptide VGF[554-577]	O15240	VGF	1.7	39	241	0.381
Heterogeneous nuclear ribonucleoprotein H3	P31942	HNRNPH3	1.7	4	14	0.426
Dihydrolipoyl dehydrogenase, mitochondrial	P09622	DLD	1.7	8	29	0.533
Arrestin domain-containing protein 1	Q8N5I2	ARRDC1	1.7	5	12	0.1
Junctional adhesion molecule A	Q9Y624	F11R	1.7	12	77	0.381
Eukaryotic peptide chain release factor subunit 1	P62495	ETF1	1.7	7	14	0.186
GTPase NRas	P01111	NRAS	1.7	1	39	0.331
E3 ubiquitin-protein ligase Itchy homolog	Q96J02	ITCH	1.7	8	20	0.241
Trifunctional purine biosynthetic protein adenosine-3; Phosphoribosylamine--glycine ligase; Phosphoribosylformylglycinamidine cyclo-ligase; Phosphoribosylglycinamide formyltransferase	P22102	GART	1.7	30	106	0.005
6-phosphogluconolactonase	O95336	PGLS	1.7	7	22	0.057
Peroxiredoxin-2	P32119	PRDX2	1.7	15	97	0.201
Protein kinase C and casein kinase substrate in neurons protein 3	Q9UKS6	PACSIN3	1.7	17	35	0.091
Protein disulfide-isomerase	P07237	P4HB	1.7	15	43	0.052
Protein transport protein Sec24C	P53992	SEC24C	1.7	9	30	0.235
Peroxiredoxin-5, mitochondrial	P30044	PRDX5	1.7	7	13	0.373
26S proteasome non-ATPase regulatory subunit 9	O00233	PSMD9	1.7	4	13	0.059
Profilin-1	P07737	PFN1	1.7	12	130	0.046
Phosphate carrier protein, mitochondrial	Q00325	SLC25A3	1.7	4	14	0.445
Inorganic pyrophosphatase	Q15181	PPA1	1.7	17	76	0.126
Disco-interacting protein 2 homolog B	Q9P265; Q9Y2E4	DIP2B	1.7	38	133	0.227
Myotrophin	P58546	MTPN	1.7	3	14	0.419
Kinesin-1 heavy chain	P33176; O60282; Q12840	KIF5B	1.7	21	37	0.018
Protein disulfide-isomerase A3	P30101	PDIA3	1.7	24	102	0.06
Calcium-binding protein 39	Q9Y376	CAB39	1.7	5	16	0.305
Metalloproteinase inhibitor 1	P01033	TIMP1	1.7	5	11	0.403
Puromycin-sensitive aminopeptidase	P55786; A6NEC2	NPEPPS	1.7	20	63	0.042
Stathmin	P16949	STMN1	1.7	5	52	0.572
Inositol-3-phosphate synthase 1	Q9NPH2	ISYNA1	1.6	6	13	0.111
G-protein coupled receptor 126	Q86SQ4	GPR126	1.6	2	7	0.236
Heterogeneous nuclear ribonucleoprotein D0	Q14103	HNRNPD	1.6	11	64	0.316
26S proteasome non-ATPase regulatory subunit 4	P55036; A2A3N6	PSMD4	1.6	10	28	0.19
Inositol hexakisphosphate and diphosphoinositol-pentakisphosphate kinase 2	O43314	PPIP5K2	1.6	4	5	0.051
Splicing factor, proline- and glutamine-rich	P23246	SFPQ	1.6	19	75	0.16
Serpin H1	P50454	SERPINH1	1.6	13	66	0.02
Glyoxylate reductase/hydroxypyruvate reductase	Q9UBQ7	GRHPR	1.6	7	22	0.28
Histone-binding protein RBBP4	Q09028	RBBP4	1.6	2	19	0.381
5-3 exoribonuclease 2	Q9H0D6	XRN2	1.6	5	15	0.191
α-actinin-4	O43707; P35609; Q08043	ACTN4	1.6	48	406	0.253
Anamorsin	Q6FI81	CIAPIN1	1.6	5	11	0.337
Histone H2B type 1-H; Histone H2B type 2-F; Histone H2B type 1-M; Histone H2B type 1-N; Histone H2B type 1-C/E/F/G/I; Histone H2B type 1-D; Histone H2B type 1-L	Q93079; Q5QNW6; Q99879; Q99877; P62807; P58876; Q99880	HIST1H2BH; HIST2H2BF; HIST1H2BM; HIST1H2BN; HIST1H2BC; HIST1H2BD; HIST1H2BL	1.6	0	46	0.794
Prohibitin-2	Q99623	PHB2	1.6	10	23	0.589
Paraspeckle component 1	Q8WXF1	PSPC1	1.6	6	15	0.222
Putative elongation factor 1-α-like 3; Elongation factor 1-α 1	Q5VTE0; P68104; Q05639	EEF1A1P5; EEF1A1	1.6	22	181	0.027
Protein S100-A11; Protein S100-A11, N-terminally processed	P31949	S100A11	1.6	5	21	0.328
UBX domain-containing protein 1	Q04323	UBXN1	1.6	4	8	0.496
Septin-9	Q9UHD8	2009-09-01	1.6	14	50	0.159
Plastin-2	P13796; P13797	LCP1	1.6	21	76	0.367
Voltage-dependent anion-selective channel protein 1	P21796	VDAC1	1.6	9	29	0.693
α-soluble NSF attachment protein	P54920; Q9H115	NAPA	1.6	10	37	0.088
Exportin-5	Q9HAV4	XPO5	1.6	7	22	0.298
Heterogeneous nuclear ribonucleoprotein A1; Heterogeneous nuclear ribonucleoprotein A1, N-terminally processed; Heterogeneous nuclear ribonucleoprotein A1-like 2	P09651; Q32P51	HNRNPA1; HNRNPA1L2	1.6	13	133	0.267
Sarcoplasmic/endoplasmic reticulum calcium ATPase 2	P16615; O14983; Q93084	ATP2A2	1.6	11	32	0.394
Ornithine aminotransferase, mitochondrial; Ornithine aminotransferase, hepatic form; Ornithine aminotransferase, renal form	P04181	OAT	1.6	10	21	0.415
ADP-ribosylation factor-like protein 15	Q9NXU5	ARL15	1.6	5	33	0.156
Small glutamine-rich tetratricopeptide repeat-containing protein α	O43765	SGTA	1.6	7	35	0.036
Eukaryotic translation initiation factor 3 subunit G	O75821	EIF3G	1.6	10	19	0.049
Rab GDP dissociation inhibitor β	P50395	GDI2	1.6	11	92	0.373
Uridine 5-monophosphate synthase; Orotate phosphoribosyltransferase; Orotidine 5-phosphate decarboxylase	P11172	UMPS	1.6	6	12	0.217
C-1-tetrahydrofolate synthase, cytoplasmic; Methylenetetrahydrofolate dehydrogenase; Methenyltetrahydrofolate cyclohydrolase; Formyltetrahydrofolate synthetase; C-1-tetrahydrofolate synthase, cytoplasmic, N-terminally processed	P11586	MTHFD1	1.6	48	211	0.128
Lactadherin; Lactadherin short form; Medin	Q08431	MFGE8	1.6	22	160	0.505
Equilibrative nucleoside transporter 1	Q99808	SLC29A1	1.6	5	20	0.525
Ezrin	P15311	EZR	1.6	20	85	0.422
DNA replication licensing factor MCM4	P33991	MCM4	1.6	18	45	0.07
Heterogeneous nuclear ribonucleoprotein M	P52272	HNRNPM	1.6	16	79	0.133
NHP2-like protein 1; NHP2-like protein 1, N-terminally processed	P55769	NHP2L1	1.6	8	29	0.323
Septin-11	Q9NVA2	2011-09-01	1.6	7	28	0.208
Intercellular adhesion molecule 1	P05362	ICAM1	1.6	18	138	0.545
Sodium-coupled neutral amino acid transporter 2	Q96QD8	SLC38A2	1.5	5	48	0.274
Nuclear pore complex protein Nup214	P35658	NUP214	1.5	25	60	0.106
Disintegrin and metalloproteinase domain-containing protein 10	O14672	ADAM10	1.5	22	110	0.27
40S ribosomal protein S19	P39019	RPS19	1.5	12	57	0.324
Ran-specific GTPase-activating protein	P43487; Q9C010	RANBP1	1.5	17	117	0.196
Peptidyl-prolyl cis-trans isomerase FKBP1A	P62942	FKBP1A	1.5	2	17	0.621
Endophilin-B1	Q9Y371	SH3GLB1	1.5	5	11	0.316
Glutathione S-transferase ω-1	P78417	GSTO1	1.5	12	42	0.233
Nectin-2	Q92692	PVRL2	1.5	10	52	0.323
DNA replication licensing factor MCM2	P49736	MCM2	1.5	21	63	0.211
Guanine nucleotide-binding protein-like 1	P36915	GNL1	1.5	7	26	0.163
Radixin	P35241	RDX	1.5	25	140	0.448
Afadin	P55196	MLLT4	1.5	36	111	0.274
DNA-(apurinic or apyrimidinic site) lyase; DNA-(apurinic or apyrimidinic site) lyase, mitochondrial	P27695	APEX1	1.5	16	47	0.317
Programmed cell death protein 6	O75340	PDCD6	1.5	7	56	0.55
Stress-70 protein, mitochondrial	P38646	HSPA9	1.5	23	99	0.502
Heterogeneous nuclear ribonucleoprotein U-like protein 2	Q1KMD3	HNRNPUL2	1.5	12	35	0.302
Tyrosine-protein kinase Lyn	P07948; P08631	LYN	1.5	26	107	0.305
26S protease regulatory subunit 4	P62191	PSMC1	1.5	12	51	0.518
Nuclear mitotic apparatus protein 1	Q14980	NUMA1	1.5	8	16	0.174
10 kDa heat shock protein, mitochondrial	P61604	HSPE1	1.5	13	60	0.699
Calcyclin-binding protein	Q9HB71	CACYBP	1.5	10	23	0.283
NSFL1 cofactor p47	Q9UNZ2	NSFL1C	1.5	10	21	0.416
Protein-L-isoaspartate(D-aspartate) O-methyltransferase	P22061	PCMT1	1.5	9	30	0.314
Fascin	Q16658	FSCN1	1.5	32	203	0.037
Dipeptidyl peptidase 3	Q9NY33	DPP3	1.5	5	15	0.385
U4/U6 small nuclear ribonucleoprotein Prp4	O43172	PRPF4	1.5	9	25	0.505
Pituitary tumor-transforming gene 1 protein-interacting protein	P53801	PTTG1IP	1.5	2	27	0.681
Hypoxia up-regulated protein 1	Q9Y4L1; Q9BXT5	HYOU1	1.5	22	72	0.12
Ribonucleoside-diphosphate reductase large subunit	P23921; Q76RD8; P32984; P20503	RRM1	1.5	16	49	0.342
Superoxide dismutase [Cu-Zn]	P00441	SOD1	1.5	12	73	0.742
AP-3 complex subunit δ-1	O14617	AP3D1	1.5	11	21	0.234
Interferon γ receptor 1	P15260	IFNGR1	1.5	5	19	0.412
Coronin-7	P57737	CORO7	1.5	8	27	0.073
Nuclear migration protein nudC	Q9Y266	NUDC	1.5	8	29	0.42
Long-chain-fatty-acid--CoA ligase 3	O95573	ACSL3	1.5	10	34	0.614
Heterogeneous nuclear ribonucleoproteins C1/C2; Heterogeneous nuclear ribonucleoprotein C-like 1; Heterogeneous nuclear ribonucleoprotein C-like 2; Heterogeneous nuclear ribonucleoprotein C-like 4; Heterogeneous nuclear ribonucleoprotein C-like 3	P07910; O60812; B2RXH8; P0DMR1; B7ZW38	HNRNPC; HNRNPCL1; HNRNPCL2; HNRNPCL4; HNRNPCL3	1.5	15	84	0.152
Histidine triad nucleotide-binding protein 1	P49773	HINT1	1.5	8	44	0.563
Thioredoxin domain-containing protein 17	Q9BRA2	TXNDC17	1.5	3	15	0.381
Proliferating cell nuclear antigen	P12004	PCNA	1.5	6	25	0.154
Disheveled-associated activator of morphogenesis 1	Q9Y4D1	DAAM1	1.5	8	17	0.372
Protein FAM49B	Q9NUQ9	FAM49B	1.5	7	28	0.16
Proliferation-associated protein 2G4	Q9UQ80	PA2G4	1.5	17	94	0.144
Protein NDRG3	Q9UGV2	NDRG3	1.5	4	12	0.485
Probable ATP-dependent RNA helicase DDX23	Q9BUQ8	DDX23	1.5	5	9	0.263
Fructose-bisphosphate aldolase A	P04075	ALDOA	1.5	37	321	0.31
Filamin-C	Q14315	FLNC	1.5	48	167	0.221
Breakpoint cluster region protein	P11274; Q12979	BCR	1.5	6	13	0.178
DNA damage-binding protein 1	Q16531	DDB1	1.5	12	37	0.249
Cofilin-1	P23528; Q9Y281	CFL1	1.5	15	166	0.099
Calcium and integrin-binding protein 1	Q99828	CIB1	1.5	9	30	0.346
Cystathionineβ-synthase	P0DN79; P35520	CBS	1.5	14	58	0.267
Ras-related protein Rab-8A	P61006	RAB8A	1.4	5	30	0.014
Insulin-like growth factor 1 receptor; Insulin-like growth factor 1 receptor α chain; Insulin-like growth factor 1 receptor β chain	P08069	IGF1R	1.4	12	34	0.175
Endothelial differentiation-related factor 1	O60869	EDF1	1.4	2	7	0.41
DNA replication licensing factor MCM5	P33992	MCM5	1.4	16	53	0.423
Cell cycle control protein 50A	Q9NV96; Q3MIR4	TMEM30A	1.4	7	17	0.365
CUB domain-containing protein 1	Q9H5V8	CDCP1	1.4	13	36	0.625
Eukaryotic translation initiation factor 2 subunit 3; Putative eukaryotic translation initiation factor 2 subunit 3-like protein	P41091; Q2VIR3	EIF2S3; EIF2S3L	1.4	24	91	0.216
Elongation factor 1-δ	P29692	EEF1D	1.4	9	36	0.294
Lactoylglutathione lyase	Q04760	GLO1	1.4	9	23	0.215
Glutamate--cysteine ligase regulatory subunit	P48507	GCLM	1.4	3	7	0.283
Programmed cell death protein 4	Q53EL6	PDCD4	1.4	5	10	0.461
Neutral α-glucosidase AB	Q14697	GANAB	1.4	29	128	0.058
Tyrosine-protein kinase BTK	Q06187	BTK	1.4	11	14	0.69
Isochorismatase domain-containing protein 1	Q96CN7	ISOC1	1.4	4	17	0.381
Calreticulin	P27797	CALR	1.4	12	35	0.58
Lamin-B receptor	Q14739	LBR	1.4	5	14	0.593
Exocyst complex component 8	Q8IYI6	EXOC8	1.4	14	23	0.502
Alcohol dehydrogenase [NADP(+)]	P14550	AKR1A1	1.4	6	14	0.435
Polyadenylate-binding protein 4	Q13310; P0CB38	PABPC4	1.4	8	17	0.25
Ubiquitin carboxyl-terminal hydrolase isozyme L5	Q9Y5K5	UCHL5	1.4	3	9	0.211
Proteasome subunit α type-2	P25787	PSMA2	1.4	8	24	0.507
Erythrocyte band 7 integral membrane protein	P27105	STOM	1.4	12	86	0.359
Zinc finger CCCH-type antiviral protein 1	Q7Z2W4; Q9H0J9	ZC3HAV1	1.4	28	93	0.167
Transcription intermediary factor 1-β	Q13263	TRIM28	1.4	16	69	0.339
Regulator of nonsense transcripts 1	Q92900	UPF1	1.4	18	42	0.216
Protein ITFG3	Q9H0X4	ITFG3	1.4	8	17	0.466
Cyclin-dependent kinase 1	P06493	CDK1	1.4	8	37	0.089
Sodium/potassium-transporting ATPase subunitβ-3	P54709	ATP1B3	1.4	7	61	0.324
Aminopeptidase B	Q9H4A4	RNPEP	1.4	11	29	0.319
Heat shock protein β-1	P04792	HSPB1	1.4	18	129	0.092
Golgin subfamily A member 2	Q08379	GOLGA2	1.4	2	6	0.359
14-3-3 proteinβ/α; 14-3-3 proteinβ/α, N-terminally processed	P31946	YWHAB	1.4	8	51	0.363
Dual specificity mitogen-activated protein kinase kinase 2	P36507	MAP2K2	1.4	7	38	0.134
DNA replication licensing factor MCM6	Q14566	MCM6	1.4	17	37	0.335
Annexin A1	P04083	ANXA1	1.4	31	225	0.536
LIM and SH3 domain protein 1	Q14847	LASP1	1.4	5	17	0.149
Ras-related protein Rab-6B; Ras-related protein Rab-6A	Q9NRW1; P20340	RAB6B; RAB6A	1.4	4	25	0.725
Sodium/potassium-transporting ATPase subunit α-2	P50993	ATP1A2	1.4	1	15	0.366
Vang-like protein 1	Q8TAA9	VANGL1	1.4	4	11	0.289
Serine/threonine-protein kinase 24; Serine/threonine-protein kinase 24 36 kDa subunit; Serine/threonine-protein kinase 24 12 kDa subunit	Q9Y6E0	STK24	1.4	4	25	0.253
Protein deglycase DJ-1	Q99497	PARK7	1.4	16	80	0.589
Syntaxin-3	Q13277	STX3	1.4	7	35	0.365
Ran GTPase-activating protein 1	P46060	RANGAP1	1.4	11	24	0.415
Cysteine--tRNA ligase, cytoplasmic	P49589	CARS	1.4	12	28	0.3
Myosin light chain 4	P12829; P05976; P08590	MYL4	1.4	7	35	0.312
Kin of IRRE-like protein 1	Q96J84	KIRREL	1.4	10	16	0.518
Sec1 family domain-containing protein 1	Q8WVM8	SCFD1	1.4	7	20	0.244
U3 small nucleolar RNA-interacting protein 2	O43818	RRP9	1.4	4	6	0.599
Queuine tRNA-ribosyltransferase	Q9BXR0	QTRT1	1.4	3	4	0.07
SRA stem-loop-interacting RNA-binding protein, mitochondrial	Q9GZT3	SLIRP	1.4	2	5	0.537
ATP-binding cassette sub-family F member 1	Q8NE71	ABCF1	1.4	26	85	0.461
Chromobox protein homolog 3	Q13185	CBX3	1.4	4	14	0.501
Structural maintenance of chromosomes protein 2	O95347	SMC2	1.4	17	33	0.386
Adenylate kinase 2, mitochondrial; Adenylate kinase 2, mitochondrial, N-terminally processed	P54819	AK2	1.4	11	38	0.727
ATP-dependent 6-phosphofructokinase, platelet type	Q01813	PFKP	1.4	16	38	0.569
DnaJ homolog subfamily C member 9	Q8WXX5	DNAJC9	1.4	4	6	0.483
Hexokinase-1	P19367	HK1	1.3	8	16	0.581
Trifunctional enzyme subunit α, mitochondrial; Long-chain enoyl-CoA hydratase; Long chain 3-hydroxyacyl-CoA dehydrogenase	P40939	HADHA	1.3	14	35	0.718
Endoplasmin	P14625; Q58FF3	HSP90B1	1.3	31	116	0.18
Mothers against decapentaplegic homolog 3; Mothers against decapentaplegic homolog 2; Mothers against decapentaplegic homolog 9	P84022; Q15796; O15198	SMAD3; SMAD2; SMAD9	1.3	2	7	0.329
Aconitate hydratase, mitochondrial	Q99798	ACO2	1.3	14	36	0.697
Phosphatidylinositol-binding clathrin assembly protein	Q13492; O60641	PICALM	1.3	5	16	0.423
Arginine--tRNA ligase, cytoplasmic	P54136	RARS	1.3	26	94	0.393
Heterogeneous nuclear ribonucleoprotein U	Q00839	HNRNPU	1.3	32	201	0.092
Wiskott-Aldrich syndrome protein family member 2	Q9Y6W5	WASF2	1.3	5	13	0.466
Guanine nucleotide-binding protein G(s) subunit α isoforms short; Guanine nucleotide-binding protein G(s) subunit α isoforms XLas	P63092; Q5JWF2; P11488; P19087; A8MTJ3	GNAS	1.3	10	34	0.384
Pyruvate kinase PKLR	P30613	PKLR	1.3	19	64	0.436
Thioredoxin	P10599	TXN	1.3	5	34	0.356
Fatty acid-binding protein, epidermal	Q01469; A8MUU1	FABP5	1.3	4	8	0.522
Ubiquitin carboxyl-terminal hydrolase 14	P54578	USP14	1.3	8	26	0.224
Glucose-6-phosphate 1-dehydrogenase	P11413	G6PD	1.3	16	82	0.032
Elongation factor 1-γ	P26641; Q9Q6P4; P14335	EEF1G	1.3	16	127	0.218
Eukaryotic translation initiation factor 1; Eukaryotic translation initiation factor 1b	P41567; O60739	EIF1; EIF1B	1.3	5	8	0.331
Transcriptional repressor p66-α	Q86YP4; Q8WXI9	GATAD2A	1.3	6	10	0.545
Dysferlin	O75923; Q9NZM1	DYSF	1.3	30	61	0.328
PC4 and SFRS1-interacting protein	O75475	PSIP1	1.3	3	12	0.53
Coatomer subunitβ	P35606	COPB2	1.3	13	51	0.594
Microtubule-associated protein 1B; MAP1B heavy chain; MAP1 light chain LC1	P46821	MAP1B	1.3	9	20	0.318
RNA-binding protein Raly	Q9UKM9	RALY	1.3	10	23	0.182
Ras-related protein Rab-21	Q9UL25	RAB21	1.3	6	22	0.352
Transmembrane emp24 domain-containing protein 9	Q9BVK6	TMED9	1.3	1	6	0.444
RuvB-like 1	Q9Y265	RUVBL1	1.3	20	113	0.404
Eukaryotic translation initiation factor 4H	Q15056	EIF4H	1.3	7	15	0.596
Large proline-rich protein BAG6	P46379	BAG6	1.3	9	24	0.446
Exportin-1	O14980	XPO1	1.3	9	36	0.686
Sodium/potassium-transporting ATPase subunit α-1	P05023; P13637; Q13733; P20648	ATP1A1	1.3	31	302	0.242
Heterogeneous nuclear ribonucleoprotein L	P14866; Q8WVV9	HNRNPL	1.3	17	97	0.228
Succinate dehydrogenase [ubiquinone] flavoprotein subunit, mitochondrial	P31040	SDHA	1.3	8	15	0.735
Bcl-2-associated transcription factor 1	Q9NYF8	BCLAF1	1.3	7	15	0.448
Annexin A11	P50995; P27216	ANXA11	1.3	23	157	0.294
Triosephosphate isomerase	P60174	TPI1	1.3	20	147	0.668
BAG family molecular chaperone regulator 2	O95816	BAG2	1.3	9	27	0.672
Apoptosis-inducing factor 1, mitochondrial	O95831	AIFM1	1.3	10	22	0.724
Malate dehydrogenase, cytoplasmic	P40925	MDH1	1.3	10	45	0.682
Phosphatidylinositol transfer protein β isoform	P48739	PITPNB	1.3	7	13	0.444
PDZ and LIM domain protein 1	O00151	PDLIM1	1.3	8	41	0.4
Complement component 1 Q subcomponent-binding protein, mitochondrial	Q07021	C1QBP	1.3	6	27	0.766
Ubiquitin carboxyl-terminal hydrolase 15	Q9Y4E8	USP15	1.3	13	39	0.511
MOB kinase activator 1B; MOB kinase activator 1A	Q7L9L4; Q9H8S9	MOB1B; MOB1A	1.3	5	11	0.25
Protein phosphatase 1G	O15355	PPM1G	1.3	6	10	0.521
Thioredoxin domain-containing protein 5	Q8NBS9	TXNDC5	1.3	6	19	0.444
DnaJ homolog subfamily A member 2	O60884	DNAJA2	1.3	11	37	0.355
55 kDa erythrocyte membrane protein	Q00013	MPP1	1.3	12	43	0.57
Heat shock 70 kDa protein 4	P34932	HSPA4	1.3	22	87	0.218
Acetyl-CoA carboxylase 1; Biotin carboxylase	Q13085; O00763	ACACA	1.3	24	46	0.72
Nicastrin	Q92542	NCSTN	1.3	7	27	0.658
Peptidyl-prolyl cis-trans isomerase FKBP5; Peptidyl-prolyl cis-trans isomerase FKBP5, N-terminally processed	Q13451	FKBP5	1.3	7	17	0.189
Transgelin-2	P37802	TAGLN2	1.3	12	54	0.522
Importin subunitβ-1	Q14974	KPNB1	1.3	13	62	0.207
Nucleolar protein 58	Q9Y2X3	NOP58	1.3	10	27	0.516
Structural maintenance of chromosomes protein 4	Q9NTJ3	SMC4	1.3	12	28	0.455
Programmed cell death protein 5	O14737	PDCD5	1.3	6	30	0.771
Syntaxin-binding protein 3	O00186	STXBP3	1.3	10	21	0.485
Heat shock protein HSP 90-α	P07900; Q14568; Q58FG0; Q58FF6; Q58FG1	HSP90AA1	1.3	34	259	0.202
40S ribosomal protein S12	P25398	RPS12	1.3	10	56	0.567
Translation initiation factor eIF-2B subunit δ	Q9UI10	EIF2B4	1.3	9	23	0.498
Myelin protein zero-like protein 1	O95297	MPZL1	1.3	8	41	0.687
Unconventional myosin-VI	Q9UM54	MYO6	1.2	14	33	0.486
Eukaryotic translation initiation factor 3 subunit D	O15371	EIF3D	1.2	11	28	0.657
Prefoldin subunit 3	P61758	VBP1	1.2	2	8	0.512
Ragulator complex protein LAMTOR1	Q6IAA8	LAMTOR1	1.2	8	37	0.731
Coatomer subunitβ	P53618	COPB1	1.2	10	37	0.537
Glycylpeptide N-tetradecanoyltransferase 1	P30419; O60551	NMT1	1.2	6	23	0.634
Protein scribble homolog	Q14160	SCRIB	1.2	30	107	0.362
Cytosol aminopeptidase	P28838	LAP3	1.2	19	50	0.203
Eukaryotic translation initiation factor 6	P56537	EIF6	1.2	10	34	0.612
Folate transporter 1	P41440	SLC19A1	1.2	5	16	0.69
N-α-acetyltransferase 50	Q9GZZ1	NAA50	1.2	8	23	0.643
Ras-related protein Rab-5C	P51148	RAB5C	1.2	6	34	0.513
Adenine phosphoribosyltransferase	P07741	APRT	1.2	5	50	0.644
Interleukin enhancer-binding factor 3	Q12906	ILF3	1.2	11	56	0.441
Importin-4	Q8TEX9	IPO4	1.2	10	31	0.669
6-phosphogluconate dehydrogenase, decarboxylating	P52209	PGD	1.2	17	76	0.385
Adenylosuccinate lyase	P30566	ADSL	1.2	11	33	0.533
Peroxiredoxin-1	Q06830	PRDX1	1.2	9	81	0.482
Hemoglobin subunit θ-1	P09105	HBQ1	1.2	3	6	0.593
Transketolase	P29401	TKT	1.2	22	74	0.698
ADP-ribosylation factor 4	P18085	ARF4	1.2	4	28	0.806
Eukaryotic translation initiation factor 5A-1	P63241; Q9GZV4; Q6IS14	EIF5A	1.2	9	62	0.617
Activated RNA polymerase II transcriptional coactivator p15	P53999	SUB1	1.2	6	31	0.41
Spectrin α chain, erythrocytic 1	P02549	SPTA1	1.2	30	61	0.453
GMP reductase 1	P36959; Q9P0U4	GMPR	1.2	8	30	0.523
Cyclin-dependent-like kinase 5	Q00535; P11802; Q96Q40; O94921; Q07002; Q00536; Q9NYV4	CDK5	1.2	3	9	0.053
Eukaryotic translation initiation factor 3 subunit B	P55884	EIF3B	1.2	12	45	0.522
Serine/threonine-protein phosphatase 2A 55 kDa regulatory subunit B α isoform	P63151; Q66LE6; Q00005	PPP2R2A	1.2	7	16	0.665
Phospholipase D3	Q8IV08	PLD3	1.2	10	73	0.56
Isocitrate dehydrogenase [NADP] cytoplasmic	O75874	IDH1	1.2	7	30	0.676
60S ribosomal protein L38	P63173	RPL38	1.2	8	39	0.259
Ras-related protein Rab-7a	P51149	RAB7A	1.2	15	98	0.29
Prolyl endopeptidase	P48147	PREP	1.2	8	21	0.539
Guanine nucleotide-binding protein subunit α-13	Q14344	GNA13	1.2	10	30	0.685
L-lactate dehydrogenase A chain	P00338; Q6ZMR3	LDHA	1.2	15	98	0.647
U6 snRNA-associated Sm-like protein LSm2	Q9Y333	LSM2	1.2	2	16	0.437
Heterogeneous nuclear ribonucleoprotein H; Heterogeneous nuclear ribonucleoprotein H, N-terminally processed; Heterogeneous nuclear ribonucleoprotein H2	P31943; P55795	HNRNPH1; HNRNPH2	1.2	7	61	0.64
Ras GTPase-activating-like protein IQGAP2	Q13576	IQGAP2	1.2	38	126	0.623
E3 SUMO-protein ligase RanBP2	P49792; A6NKT7; Q99666; O14715; P0DJD0; P0DJD1; Q7Z3J3	RANBP2	1.2	10	16	0.638
EH domain-containing protein 4	Q9H223	EHD4	1.2	8	21	0.65
Spliceosome RNA helicase DDX39B	Q13838	DDX39B	1.2	3	62	0.542
Probable ATP-dependent RNA helicase DDX5	P17844	DDX5	1.2	26	143	0.41
Prohibitin	P35232	PHB	1.2	13	43	0.867
Carboxymethylenebutenolidase homolog	Q96DG6	CMBL	1.2	9	44	0.494
Extended synaptotagmin-1	Q9BSJ8	ESYT1	1.2	16	49	0.422
Acetyl-CoA acetyltransferase, cytosolic	Q9BWD1	ACAT2	1.2	7	20	0.652
Heterogeneous nuclear ribonucleoprotein K	P61978	HNRNPK	1.2	20	115	0.623
Heterogeneous nuclear ribonucleoprotein F; Heterogeneous nuclear ribonucleoprotein F, N-terminally processed	P52597	HNRNPF	1.2	6	11	0.504
Vigilin	Q00341	HDLBP	1.2	7	19	0.446
Exosome complex component MTR3	Q5RKV6	EXOSC6	1.2	6	14	0.671
Glyoxalase domain-containing protein 4	Q9HC38	GLOD4	1.2	5	10	0.723
Acyl-protein thioesterase 1	O75608	LYPLA1	1.2	5	15	0.767
Tumor necrosis factor receptor superfamily member 10B	O14763	TNFRSF10B	1.2	4	21	0.611
Mitochondrial import inner membrane translocase subunit TIM50	Q3ZCQ8	TIMM50	1.2	6	14	0.702
Enhancer of mRNA-decapping protein 4	Q6P2E9	EDC4	1.2	12	46	0.525
ATP-dependent RNA helicase DDX3X; ATP-dependent RNA helicase DDX3Y	O00571; O15523; Q9NQI0	DDX3X; DDX3Y	1.2	19	68	0.305
Interleukin enhancer-binding factor 2	Q12905	ILF2	1.2	9	27	0.739
Branched-chain-amino-acid aminotransferase, cytosolic	P54687	BCAT1	1.2	4	15	0.587
Plasma membrane calcium-transporting ATPase 4	P23634	ATP2B4	1.2	6	17	0.813
Glycogen phosphorylase, brain form	P11216; P11217	PYGB	1.2	9	23	0.831
Heterogeneous nuclear ribonucleoprotein A3	P51991	HNRNPA3	1.2	12	46	0.711
Leucine-rich repeat-containing protein 47	Q8N1G4	LRRC47	1.2	16	74	0.704
Ras GTPase-activating-like protein IQGAP1	P46940	IQGAP1	1.2	44	167	0.78
Annexin A7	P20073	ANXA7	1.2	7	30	0.607
GDP-L-fucose synthase	Q13630	TSTA3	1.2	3	11	0.684
Eukaryotic translation initiation factor 3 subunit F	O00303	EIF3F	1.2	7	25	0.733
Tyrosine-protein phosphatase non-receptor type 11	Q06124	PTPN11	1.2	7	24	0.699
L-lactate dehydrogenase B chain	P07195; P07864	LDHB	1.2	14	102	0.639
Cytoskeleton-associated protein 5	Q14008	CKAP5	1.2	25	73	0.361
Coatomer subunit ζ-1	P61923	COPZ1	1.2	3	10	0.61
Lymphocyte function-associated antigen 3	P19256	CD58	1.2	3	14	0.824
Synaptosomal-associated protein 23	O00161	SNAP23	1.2	12	57	0.615
Heat shock cognate 71 kDa protein	P11142; P54652	HSPA8	1.2	47	575	0.399
Mitotic checkpoint protein BUB3	O43684	BUB3	1.2	8	26	0.657
Translation initiation factor eIF-2B subunit γ	Q9NR50	EIF2B3	1.2	4	13	0.491
Septin-7	Q16181; Q6ZU15	2007-09-01	1.2	18	91	0.436
F-actin-capping protein subunit α-1	P52907	CAPZA1	1.2	10	71	0.171
Glutamate-rich WD repeat-containing protein 1	Q9BQ67	GRWD1	1.2	3	5	0.698
Leucine--tRNA ligase, cytoplasmic	Q9P2J5	LARS	1.1	30	106	0.65
Dystroglycan; α-dystroglycan;β-dystroglycan	Q14118	DAG1	1.1	5	10	0.798
Vasodilator-stimulated phosphoprotein	P50552	VASP	1.1	12	61	0.69
ATP-dependent 6-phosphofructokinase, liver type	P17858	PFKL	1.1	10	36	0.664
Calnexin	P27824	CANX	1.1	14	54	0.751
Protein transport protein Sec31A	O94979	SEC31A	1.1	13	34	0.524
DNA topoisomerase 2-α	P11388	TOP2A	1.1	13	41	0.864
FACT complex subunit SSRP1	Q08945	SSRP1	1.1	8	22	0.621
Eukaryotic translation initiation factor 3 subunit I	Q13347	EIF3I	1.1	11	49	0.62
Ubiquitin-40S ribosomal protein S27a; Ubiquitin; 40S ribosomal protein S27a; Ubiquitin-60S ribosomal protein L40; Ubiquitin; 60S ribosomal protein L40; Polyubiquitin-B; Ubiquitin; Polyubiquitin-C; Ubiquitin	P62979; P62987; P0CG47; P0CG48	RPS27A; UBA52; UBB; UBC	1.1	20	357	0.539
Nucleosome assembly protein 1-like 4	Q99733	NAP1L4	1.1	12	66	0.617
Heat shock 70 kDa protein 1B; Heat shock 70 kDa protein 1A	P0DMV9; P0DMV8	HSPA1B; HSPA1A	1.1	33	321	0.635
FAS-associated factor 1	Q9UNN5	FAF1	1.1	4	7	0.567
Inactive tyrosine-protein kinase 7	Q13308	PTK7	1.1	21	80	0.555
Prostaglandin E synthase 3	Q15185	PTGES3	1.1	10	43	0.563
Probable ATP-dependent RNA helicase DDX6	P26196	DDX6	1.1	4	15	0.741
Solute carrier family 12 member 2	P55011	SLC12A2	1.1	16	54	0.584
Cullin-4B	Q13620	CUL4B	1.1	6	16	0.709
Insulin-like growth factor 2 mRNA-binding protein 3	O00425	IGF2BP3	1.1	11	32	0.516
60 kDa heat shock protein, mitochondrial	P10809	HSPD1	1.1	36	179	0.861
Cullin-associated NEDD8-dissociated protein 1	Q86VP6; O75155	CAND1	1.1	22	66	0.757
Annexin A2; Putative annexin A2-like protein	P07355; A6NMY6	ANXA2; ANXA2P2	1.1	26	198	0.64
Cytosolic acyl coenzyme A thioester hydrolase	O00154	ACOT7	1.1	6	13	0.721
Transmembrane 9 superfamily member 2	Q99805	TM9SF2	1.1	7	21	0.681
Multifunctional protein ADE2; Phosphoribosylaminoimidazole-succinocarboxamide synthase; Phosphoribosylaminoimidazole carboxylase	P22234	PAICS	1.1	16	68	0.688
AP-2 complex subunit β	P63010	AP2B1	1.1	10	54	0.733
GTPase-activating protein and VPS9 domain-containing protein 1	Q14C86	GAPVD1	1.1	16	45	0.615
Mothers against decapentaplegic homolog 1; Mothers against decapentaplegic homolog 5	Q15797; Q99717	SMAD1; SMAD5	1.1	2	8	0.575
Rho-related GTP-binding protein RhoC	P08134	RHOC	1.1	2	44	0.526
F-actin-capping protein subunitβ	P47756	CAPZB	1.1	10	64	0.412
Receptor-type tyrosine-protein phosphatase α	P18433	PTPRA	1.1	15	54	0.75
14-3-3 protein η	Q04917	YWHAH	1.1	12	56	0.457
Feline leukemia virus subgroup C receptor-related protein 1	Q9Y5Y0	FLVCR1	1.1	5	18	0.873
14-3-3 protein θ	P27348	YWHAQ	1.1	14	64	0.777
Cleavage stimulation factor subunit 2	P33240	CSTF2	1.1	2	9	0.826
Platelet-activating factor acetylhydrolase IB subunit β	P68402	PAFAH1B2	1.1	2	8	0.802
Prefoldin subunit 2	Q9UHV9	PFDN2	1.1	5	12	0.841
Serrate RNA effector molecule homolog	Q9BXP5	SRRT	1.1	7	21	0.605
Aminoacyl tRNA synthase complex-interacting multifunctional protein 1; Endothelial monocyte-activating polypeptide 2	Q12904	AIMP1	1.1	15	69	0.513
Protein SET; Protein SETSIP	Q01105; P0DME0	SET; SETSIP	1.1	7	25	0.906
Histone H2A type 1-J; Histone H2A type 1-H; Histone H2A type 1; Histone H2A,J; Histone H2A type 2-C; Histone H2A type 2-A	Q99878; Q96KK5; P0C0S8; Q9BTM1; Q16777; Q6FI13	HIST1H2AJ; HIST1H2AH; HIST1H2AG; H2AFJ; HIST2H2AC; HIST2H2AA3	1.1	0	14	0.937
RuvB-like 2	Q9Y230	RUVBL2	1.1	18	87	0.695
Eukaryotic initiation factor 4A-I	P60842	EIF4A1	1.1	7	90	0.347
Coatomer subunit δ	P48444	ARCN1	1.1	11	32	0.639
Anion exchange protein 2	P04920	SLC4A2	1.1	10	28	0.887
Proteasome subunit α type-1	P25786	PSMA1	1.1	6	35	0.587
α-centractin	P61163	ACTR1A	1.1	4	44	0.715
Pyruvate kinase PKM	P14618	PKM	1.1	34	434	0.61
26S proteasome non-ATPase regulatory subunit 3	O43242	PSMD3	1.1	20	99	0.81
Elongation factor 2	P13639	EEF2	1.1	38	284	0.584
Heterochromatin protein 1-binding protein 3	Q5SSJ5	HP1BP3	1.1	13	39	0.902
Serine/arginine-rich splicing factor 2; Serine/arginine-rich splicing factor 8	Q01130; Q9BRL6	SRSF2; SRSF8	1.1	4	15	0.882
Chloride intracellular channel protein 1	O00299	CLIC1	1.1	19	192	0.779
Glycine--tRNA ligase	P41250	GARS	1.1	23	93	0.613
Eukaryotic translation initiation factor 2 subunit 2	P20042	EIF2S2	1.1	16	69	0.686
Signal peptide peptidase-like 2B	Q8TCT7	SPPL2B	1.1	2	3	0.678
Signal transducer and activator of transcription 5A	P42229	STAT5A	1.1	3	27	0.713
Nucleosome assembly protein 1-like 1	P55209	NAP1L1	1.1	8	58	0.464
SH3 domain-binding glutamic acid-rich-like protein	O75368	SH3BGRL	1.1	3	15	0.878
Metallo-β-lactamase domain-containing protein 2	Q68D91	MBLAC2	1.1	4	11	0.665
Abl interactor 1	Q8IZP0; Q9NYB9	ABI1	1.1	8	27	0.707
40S ribosomal protein S10	P46783; Q9NQ39	RPS10	1.1	7	48	0.851
Translational activator GCN1	Q92616; Q2F7J2; Q2F7I9; Q27ID9; Q2F7J3; Q2F7J0; A1Z651	GCN1L1	1.1	40	109	0.831
Dynactin subunit 1	Q14203	DCTN1	1.1	19	38	0.805
Methylosome protein 50	Q9BQA1	WDR77	1.1	7	10	0.725
Lysosomal-associated transmembrane protein 4B	Q86VI4	LAPTM4B	1.1	2	7	0.834
Heat shock protein HSP 90-β	P08238; Q58FF7	HSP90AB1	1.1	33	568	0.633
Endoplasmic reticulum resident protein 44	Q9BS26	ERP44	1.1	13	62	0.644
Splicing factor 3B subunit 2	Q13435	SF3B2	1.1	9	30	0.698
Leukosialin	P16150	SPN	1.1	4	21	0.935
Low molecular weight phosphotyrosine protein phosphatase	P24666	ACP1	1.1	4	15	0.911
Calmodulin-3	P0DP25; P0DP24; P0DP23	CALM3	1.1	5	68	0.794
DNA replication licensing factor MCM3	P25205	MCM3	1.1	29	93	0.595
Nuclear pore complex protein Nup93	Q8N1F7	NUP93	1.1	10	19	0.882
Golgin subfamily A member 7	Q7Z5G4	GOLGA7	1.1	2	12	0.871
Elongation factor 1-β	P24534	EEF1B2	1.1	6	34	0.832
SAM domain-containing protein SAMSN-1	Q9NSI8	SAMSN1	1.1	8	34	0.822
Coronin-1B	Q9BR76; Q6QEF8; A9Z1Z3	CORO1B	1.1	8	24	0.739
Protein MAK16 homolog	Q9BXY0	MAK16	1.1	4	19	0.797
WD repeat-containing protein 18	Q9BV38	WDR18	1.1	4	15	0.913
Vesicle-associated membrane protein-associated protein A	Q9P0L0	VAPA	1.1	5	27	0.533
rRNA 2-O-methyltransferase fibrillarin	P22087	FBL	1.1	12	61	0.595
Transcription elongation factor B polypeptide 1	Q15369	TCEB1	1.1	3	14	0.901
Serine/threonine-protein kinase OSR1	O95747	OXSR1	1.1	6	13	0.745
Phosphoglycerate kinase 1	P00558	PGK1	1.1	26	287	0.815
Ubiquitin carboxyl-terminal hydrolase 5	P45974	USP5	1.1	11	44	0.837
Threonine--tRNA ligase, cytoplasmic	P26639	TARS	1.1	21	87	0.789
CCR4-NOT transcription complex subunit 1	A5YKK6	CNOT1	1.1	10	25	0.905
26S protease regulatory subunit 6A	P17980	PSMC3	1	10	74	0.865
Splicing factor 3A subunit 3	Q12874	SF3A3	1	6	18	0.91
Serine/arginine-rich splicing factor 6	Q13247	SRSF6	1	3	17	0.92
ATP synthase subunit α, mitochondrial	P25705	ATP5A1	1	23	98	0.95
Poly(rC)-binding protein 1	Q15365	PCBP1	1	10	66	0.872
Eukaryotic translation initiation factor 3 subunit C; Eukaryotic translation initiation factor 3 subunit C-like protein	Q99613; B5ME19	EIF3C; EIF3CL	1	20	78	0.831
Copine-1	Q99829	CPNE1	1	7	26	0.904
60S acidic ribosomal protein P0; 60S acidic ribosomal protein P0-like	P05388; Q8NHW5	RPLP0; RPLP0P6	1	12	73	0.923
26S proteasome non-ATPase regulatory subunit 6	Q15008	PSMD6	1	18	55	0.821
14-3-3 protein ε	P62258	YWHAE	1	14	88	0.907
Lysine--tRNA ligase	Q15046	KARS	1	11	27	0.945
ATP-citrate synthase	P53396	ACLY	1	27	115	0.895
ATP synthase subunit O, mitochondrial	P48047	ATP5O	1	8	28	0.972
Flavin reductase (NADPH)	P30043	BLVRB	1	7	75	0.918
Zinc transporter 1	Q9Y6M5	SLC30A1	1	9	28	0.964
Vesicle-fusing ATPase	P46459	NSF	1	16	42	0.896
Actin-related protein 2/3 complex subunit 2	O15144	ARPC2	1	6	19	0.96
Citrate synthase, mitochondrial	O75390	CS	1	10	33	0.951
Ras-related protein Ral-A	P11233	RALA	1	8	52	0.952
Chloride intracellular channel protein 2	O15247	CLIC2	1	15	67	0.949
Basic leucine zipper and W2 domain-containing protein 1	Q7L1Q6	BZW1	1	4	12	0.965
Basic leucine zipper and W2 domain-containing protein 2	Q9Y6E2	BZW2	1	10	29	0.932
Septin-6	Q14141	2006-09-01	1	10	45	0.955
Alanine--tRNA ligase, cytoplasmic	P49588	AARS	1	25	92	0.956
Amidophosphoribosyltransferase	Q06203	PPAT	1	12	41	0.971
Proteasome subunit β type-2	P49721	PSMB2	1	3	12	0.99
High mobility group protein B1; Putative high mobility group protein B1-like 1	P09429; B2RPK0	HMGB1; HMGB1P1	1	6	34	0.994
Eukaryotic translation initiation factor 3 subunit A	Q14152	EIF3A	1	33	98	0.984
Serine hydroxymethyltransferase, mitochondrial	P34897	SHMT2	1	25	87	0.994
26S protease regulatory subunit 6B	P43686	PSMC4	1	20	71	0.988
B. Downregulated proteins in K562IR exosomes
Protein names	Protein IDs	Gene names	Fold change	Unique peptides	MS/MS Count	Permutation-based FDR
26S proteasome non-ATPase regulatory subunit 2	Q13200	PSMD2	-1	20	108	0.994
Cytoplasmic dynein 1 intermediate chain 2	Q13409	DYNC1I2	-1	7	23	0.996
Latent-transforming growth factorβ-binding protein 1	Q14766	LTBP1	-1	16	44	0.997
Leucine-rich repeat-containing protein 57	Q8N9N7	LRRC57	-1	5	12	0.994
Proteasome subunit α type-7; Proteasome subunit α type-7-like	O14818; Q8TAA3	PSMA7; PSMA8	-1	10	36	0.995
Argininosuccinate synthase	P00966	ASS1	-1	8	20	0.99
Serine/threonine-protein phosphatase PP1-α catalytic subunit	P62136	PPP1CA	-1	5	59	0.989
AP-2 complex subunit α-1	O95782	AP2A1	-1	17	78	0.982
Hexokinase-2	P52789	HK2	-1	6	18	0.972
Cytoplasmic dynein 1 light intermediate chain 1	Q9Y6G9	DYNC1LI1	-1	18	57	0.97
N-acylneuraminate cytidylyltransferase	Q8NFW8	CMAS	-1	7	25	0.971
Aminoacyl tRNA synthase complex-interacting multifunctional protein 2	Q13155	AIMP2	-1	6	35	0.915
Catechol O-methyltransferase	P21964	COMT	-1	8	42	0.985
ATP-dependent RNA helicase DDX1	Q92499	DDX1	-1	18	66	0.931
Plasma membrane calcium-transporting ATPase 1	P20020; Q01814	ATP2B1	-1	11	90	0.942
GTP-binding protein Rheb	Q15382	RHEB	-1	4	14	0.97
Eukaryotic translation initiation factor 2A; Eukaryotic translation initiation factor 2A, N-terminally processed	Q9BY44	EIF2A	-1	10	31	0.952
Tubulin β-4A chain	P04350	TUBB4A	-1	2	19	0.967
Heterogeneous nuclear ribonucleoprotein Q	O60506	SYNCRIP	-1	17	55	0.954
Protein RCC2	Q9P258	RCC2	-1	22	93	0.943
Ribose-phosphate pyrophosphokinase 1; Ribose-phosphate pyrophosphokinase 3	P60891; P21108	PRPS1; PRPS1L1	-1	5	34	0.941
3-mercaptopyruvate sulfurtransferase	P25325	MPST	-1	10	37	0.946
Heterogeneous nuclear ribonucleoprotein U-like protein 1	Q9BUJ2	HNRNPUL1	-1	12	44	0.904
Carbonyl reductase [NADPH] 1	P16152	CBR1	-1	5	25	0.943
Dynamin-2	P50570; Q05193	DNM2	-1	18	101	0.943
Peptidyl-prolyl cis-trans isomerase FKBP8	Q14318	FKBP8	-1	3	5	0.948
Coatomer subunit γ-1	Q9Y678	COPG1	-1	12	48	0.892
26S protease regulatory subunit 8	P62195	PSMC5	-1	12	66	0.912
tRNA-splicing ligase RtcB homolog	Q9Y3I0	RTCB	-1	9	38	0.898
α-enolase	P06733; P13929	ENO1	-1	45	350	0.919
Nostrin	Q8IVI9	NOSTRIN	-1	8	32	0.824
SLIT-ROBO Rho GTPase-activating protein 2	O75044; P0DMP2; P0DJJ0; Q7Z6B7	SRGAP2	-1	10	37	0.927
V-type proton ATPase catalytic subunit A	P38606	ATP6V1A	-1	19	58	0.874
N(G),N(G)-dimethylarginine dimethylaminohydrolase 2	O95865	DDAH2	-1	7	26	0.947
Vacuolar protein sorting-associated protein 29	Q9UBQ0	VPS29	-1	5	25	0.874
Aflatoxin B1 aldehyde reductase member 2	O43488; O95154	AKR7A2	-1	2	18	0.769
U5 small nuclear ribonucleoprotein 200 kDa helicase	O75643	SNRNP200	-1	42	134	0.95
60S ribosomal protein L21	P46778	RPL21	-1	11	59	0.911
α-actinin-1	P12814	ACTN1	-1	11	21	0.938
40S ribosomal protein S30	P62861	FAU	-1	2	11	0.959
Cyclin-Y	Q8ND76; Q8N7R7	CCNY	-1	5	11	0.951
Valine--tRNA ligase	P26640	VARS	-1	33	161	0.857
Glucose-6-phosphate isomerase	P06744	GPI	-1	12	66	0.956
CTP synthase 1	P17812	CTPS1	-1	8	17	0.724
Importin-7	O95373	IPO7	-1	9	25	0.95
N-terminal Xaa-Pro-Lys N-methyltransferase 1; N-terminal Xaa-Pro-Lys N-methyltransferase 1, N-terminally processed	Q9BV86	NTMT1	-1	5	9	0.908
Adenylosuccinate synthetase isozyme 2	P30520	ADSS	-1	4	16	0.914
Glyceraldehyde-3-phosphate dehydrogenase	P04406; O60733	GAPDH	-1	28	339	0.842
Cytoplasmic FMR1-interacting protein 1; Cytoplasmic FMR1-interacting protein 2	Q7L576; Q96F07	CYFIP1; CYFIP2	-1	10	45	0.84
Calpain small subunit 1	P04632; Q96L46	CAPNS1	-1	5	19	0.918
Transformer-2 protein homolog α	Q13595	TRA2A	-1	5	9	0.91
Serine/threonine-protein phosphatase 2A catalytic subunit α isoform	P67775	PPP2CA	-1.1	4	49	0.757
Coatomer subunit ε	O14579	COPE	-1.1	5	20	0.829
Thyroid hormone receptor-associated protein 3	Q9Y2W1	THRAP3	-1.1	6	10	0.915
CAD protein; Glutamine-dependent carbamoyl-phosphate synthase; Aspartate carbamoyltransferase; Dihydroorotase	P27708	CAD	-1.1	31	92	0.882
Probable ATP-dependent RNA helicase DDX17	Q92841	DDX17	-1.1	25	130	0.836
Integrin β-1	P05556	ITGB1	-1.1	14	65	0.917
Heparan sulfate glucosamine 3-O-sulfotransferase 3B1; Heparan sulfate glucosamine 3-O-sulfotransferase 3A1; Heparan sulfate glucosamine 3-O-sulfotransferase 6	Q9Y662; Q9Y663; Q96QI5; Q9Y661; Q5TG30	HS3ST3B1; HS3ST3A1; HS3ST6	-1.1	5	16	0.815
S-adenosylmethionine synthase isoform type-2	P31153	MAT2A	-1.1	7	27	0.775
Guanine nucleotide-binding protein G(q) subunit α	P50148	GNAQ	-1.1	7	35	0.83
60S ribosomal protein L11	P62913	RPL11	-1.1	8	33	0.592
26S proteasome non-ATPase regulatory subunit 5	Q5IFJ8; Q16401	PSMD5	-1.1	13	60	0.77
Bifunctional glutamate/proline--tRNA ligase; Glutamate--tRNA ligase; Proline--tRNA ligase	P07814	EPRS	-1.1	63	378	0.549
14-3-3 protein ζ/δ	P63104	YWHAZ	-1.1	14	166	0.861
Unconventional myosin-Ic	O00159	MYO1C	-1.1	17	64	0.812
DNA-directed RNA polymerase II subunit RPB1	P24928	POLR2A	-1.1	13	36	0.891
Septin-2	Q15019	2002-09-01	-1.1	12	68	0.377
Adenylyl cyclase-associated protein 1	Q01518; P40123	CAP1	-1.1	14	51	0.831
60S ribosomal protein L10a	P62906	RPL10A	-1.1	10	74	0.817
Pre-mRNA-processing factor 19	Q9UMS4	PRPF19	-1.1	19	104	0.761
Melanoma-associated antigen D2	Q9UNF1; Q9Y5V3; Q12816	MAGED2	-1.1	10	25	0.913
CUGBP Elav-like family member 2	O95319; Q92879	CELF2	-1.1	3	14	0.834
Acidic leucine-rich nuclear phosphoprotein 32 family member A	P39687; O95626; O43423	ANP32A	-1.1	9	37	0.897
Small nuclear ribonucleoprotein-associated proteins B and B; Small nuclear ribonucleoprotein-associated protein N	P14678; P63162	SNRPB; SNRPN	-1.1	3	19	0.698
Nucleophosmin	P06748	NPM1	-1.1	15	103	0.806
Tumor necrosis factor receptor superfamily member 1A; Tumor necrosis factor receptor superfamily member 1A, membrane form; Tumor necrosis factor-binding protein 1	P19438	TNFRSF1A	-1.1	3	5	0.807
AP-2 complex subunit μ	Q96CW1	AP2M1	-1.1	16	42	0.864
Exportin-T	O43592	XPOT	-1.1	5	13	0.776
Ras-related protein Rab-27A	P51159	RAB27A	-1.1	5	21	0.897
Tubulin β chain	P07437	TUBB	-1.1	4	116	0.712
26S protease regulatory subunit 10B	P62333	PSMC6	-1.1	14	61	0.777
60S ribosomal protein L23	P62829	RPL23	-1.1	8	58	0.788
Proteasome-associated protein ECM29 homolog	Q5VYK3	ECM29	-1.1	15	24	0.703
Proteasome subunit α type-5	P28066	PSMA5	-1.1	7	35	0.788
Protein 4,1	P11171	EPB41	-1.1	23	121	0.765
Moesin	P26038	MSN	-1.1	36	297	0.832
Apolipoprotein C-III	P02656	APOC3	-1.1	2	21	0.9
Probable 28S rRNA (cytosine(4447)-C(5))-methyltransferase	P46087	NOP2	-1.1	14	48	0.738
Vesicle transport through interaction with t-SNAREs homolog 1B	Q9UEU0	VTI1B	-1.1	4	18	0.857
Eukaryotic initiation factor 4A-III; Eukaryotic initiation factor 4A-III, N-terminally processed	P38919	EIF4A3	-1.1	11	29	0.666
Probable ATP-dependent RNA helicase DDX27	Q96GQ7	DDX27	-1.1	8	15	0.672
Transitional endoplasmic reticulum ATPase	P55072	VCP	-1.1	28	162	0.742
ATP-dependent RNA helicase A	Q08211	DHX9	-1.1	35	181	0.609
Actin-related protein 2/3 complex subunit 1B	O15143	ARPC1B	-1.1	9	38	0.627
Neutral amino acid transporter B(0)	Q15758	SLC1A5	-1.1	13	167	0.778
Phosphoglycerate mutase 1	P18669; P15259; Q8N0Y7	PGAM1	-1.1	8	64	0.666
Ras-related C3 botulinum toxin substrate 2	P15153	RAC2	-1.1	4	27	0.625
V-type proton ATPase 116 kDa subunit a isoform 1	Q93050	ATP6V0A1	-1.1	6	22	0.835
Tubulin-folding cofactor B	Q99426	TBCB	-1.1	4	9	0.768
Sequestosome-1	Q13501	SQSTM1	-1.1	13	64	0.717
Histone-arginine methyltransferase CARM1	Q86X55	CARM1	-1.1	5	19	0.627
Ras-related protein Rab-1A	P62820	RAB1A	-1.1	5	43	0.767
Guanine nucleotide-binding protein G(I)/G(S)/G(T) subunit β-2	P62879	GNB2	-1.1	4	59	0.498
ATP-binding cassette sub-family E member 1	P61221	ABCE1	-1.1	20	73	0.657
Methionine--tRNA ligase, cytoplasmic	P56192	MARS	-1.1	30	148	0.626
Malate dehydrogenase, mitochondrial	P40926	MDH2	-1.1	18	137	0.909
Transcription activator BRG1	P51532; P51531	SMARCA4	-1.1	13	29	0.733
Serine/threonine-protein kinase mTOR	P42345	MTOR	-1.1	7	17	0.693
Aldo-keto reductase family 1 member C1; Aldo-keto reductase family 1 member C3; Aldo-keto reductase family 1 member C2; Aldo-keto reductase family 1 member C4	Q04828; P42330; P52895; P17516	AKR1C1; AKR1C3; AKR1C2; AKR1C4	-1.1	5	18	0.846
Glutamine--tRNA ligase	P47897	QARS	-1.1	17	44	0.546
60S ribosomal protein L12	P30050	RPL12	-1.1	10	79	0.583
Neuroplastin	Q9Y639	NPTN	-1.1	3	13	0.765
Eukaryotic translation initiation factor 1A, X-chromosomal; Eukaryotic translation initiation factor 1A, Y-chromosomal	P47813; O14602	EIF1AX; EIF1AY	-1.1	4	10	0.8
Signal recognition particle subunit SRP68	Q9UHB9	SRP68	-1.1	13	41	0.821
Ras-related C3 botulinum toxin substrate 1; Ras-related C3 botulinum toxin substrate 3	P63000; P60763	RAC1; RAC3	-1.1	6	81	0.633
40S ribosomal protein S20	P60866	RPS20	-1.1	8	38	0.446
Ribosomal protein S6 kinase α-3	P51812; Q15349; Q15418; Q9UK32	RPS6KA3	-1.1	4	9	0.736
Flotillin-1	O75955	FLOT1	-1.1	15	74	0.692
60S acidic ribosomal protein P2	P05387	RPLP2	-1.1	12	74	0.511
Myosin regulatory light chain 12A; Myosin regulatory light chain 12B	P19105; O14950	MYL12A; MYL12B	-1.1	3	22	0.611
Proteasome subunit α type-4	P25789	PSMA4	-1.1	5	17	0.829
Rho guanine nucleotide exchange factor 2	Q92974; REV__P0DJD0; REV__P0DJD1; REV__A6NKT7; REV__Q99666; REV__O14715	ARHGEF2	-1.1	13	23	0.742
CLIP-associating protein 1	Q7Z460	CLASP1	-1.1	8	15	0.579
Ribosome production factor 2 homolog	Q9H7B2	RPF2	-1.1	5	15	0.553
Coatomer subunit γ-2	Q9UBF2	COPG2	-1.1	5	14	0.575
Small nuclear ribonucleoprotein Sm D2	P62316	SNRPD2	-1.1	8	55	0.479
Guanine nucleotide-binding protein G(k) subunit α	P08754; P63096	GNAI3	-1.1	8	80	0.349
Nucleolin	P19338	NCL	-1.1	39	143	0.829
H/ACA ribonucleoprotein complex subunit 1	Q9NY12	GAR1	-1.1	5	30	0.782
Cytosolic non-specific dipeptidase	Q96KP4	CNDP2	-1.2	10	42	0.622
Zinc transporter ZIP14	Q15043	SLC39A14	-1.2	3	15	0.692
Vacuolar protein sorting-associated protein 35	Q96QK1	VPS35	-1.2	14	48	0.425
40S ribosomal protein S7	P62081	RPS7	-1.2	15	73	0.605
Guanine nucleotide-binding protein G(I)/G(S)/G(O) subunit γ-5	P63218	GNG5	-1.2	5	23	0.667
Thrombospondin-1	P07996; P35442	THBS1	-1.2	9	46	0.623
High mobility group protein HMG-I/HMG-Y	P17096	HMGA1	-1.2	6	58	0.866
Bifunctional purine biosynthesis protein PURH; Phosphoribosylaminoimidazolecarboxamide formyltransferase; IMP cyclohydrolase	P31939	ATIC	-1.2	36	188	0.374
26S protease regulatory subunit 7	P35998	PSMC2	-1.2	30	104	0.477
Histone H1,4; Histone H1,3	P10412; P16402; Q02539; P22492	HIST1H1E; HIST1H1D	-1.2	3	354	0.896
V-type proton ATPase subunit E 1	P36543; Q96A05	ATP6V1E1	-1.2	5	23	0.705
Coatomer subunit α; Xenin; Proxenin	P53621	COPA	-1.2	38	139	0.465
40S ribosomal protein S5; 40S ribosomal protein S5, N-terminally processed	P46782	RPS5	-1.2	13	88	0.485
Metastasis-associated protein MTA2	O94776	MTA2	-1.2	19	63	0.586
26S proteasome non-ATPase regulatory subunit 11	O00231	PSMD11	-1.2	19	76	0.708
Phenylalanine--tRNA ligase α subunit	Q9Y285	FARSA	-1.2	9	60	0.631
Phenylalanine--tRNA ligaseβ subunit	Q9NSD9	FARSB	-1.2	21	99	0.41
26S proteasome non-ATPase regulatory subunit 12	O00232	PSMD12	-1.2	7	22	0.819
tRNA (uracil-5-)-methyltransferase homolog A	Q8IZ69	TRMT2A	-1.2	8	19	0.254
Solute carrier family 12 member 7	Q9Y666; Q9H2X9	SLC12A7	-1.2	8	21	0.635
Ran-binding protein 9	Q96S59	RANBP9	-1.2	5	17	0.614
Neurogenic locus notch homolog protein 1; Notch 1 extracellular truncation; Notch 1 intracellular domain	P46531	NOTCH1	-1.2	9	35	0.623
Putative RNA-binding protein Luc7-like 2	Q9Y383	LUC7L2	-1.2	8	55	0.507
Rho-related GTP-binding protein RhoG	P84095	RHOG	-1.2	10	86	0.357
Neural proliferation differentiation and control protein 1	Q9NQX5	NPDC1	-1.2	2	6	0.495
Signal recognition particle 14 kDa protein	P37108	SRP14	-1.2	6	44	0.662
MARCKS-related protein	P49006	MARCKSL1	-1.2	10	41	0.764
ADP-ribosylation factor 1; ADP-ribosylation factor 3	P84077; P61204	ARF1; ARF3	-1.2	2	19	0.846
Basigin	P35613	BSG	-1.2	12	88	0.505
Flotillin-2	Q14254	FLOT2	-1.2	23	97	0.709
SUMO-activating enzyme subunit 2	Q9UBT2	UBA2	-1.2	12	29	0.567
Mitogen-activated protein kinase 1	P28482	MAPK1	-1.2	10	78	0.359
40S ribosomal protein SA	P08865	RPSA	-1.2	15	114	0.4
V-type proton ATPase subunit B, brain isoform	P21281; P15313	ATP6V1B2	-1.2	19	96	0.368
Syntaxin-4	Q12846	STX4	-1.2	7	34	0.382
Ubiquitin thioesterase OTUB1	Q96FW1	OTUB1	-1.2	7	36	0.485
Ras-related protein Rab-10	P61026	RAB10	-1.2	4	28	0.548
Cell division control protein 42 homolog	P60953; P17081; Q9H4E5	CDC42	-1.2	12	120	0.314
60S ribosomal protein L30	P62888	RPL30	-1.2	12	79	0.31
Transmembrane protein 59	Q9BXS4	TMEM59	-1.2	7	31	0.526
Pre-mRNA-splicing factor ATP-dependent RNA helicase DHX15	O43143	DHX15	-1.2	13	33	0.497
Cleavage and polyadenylation specificity factor subunit 6	Q16630	CPSF6	-1.2	3	7	0.579
Secretory carrier-associated membrane protein 2	O15127	SCAMP2	-1.2	3	31	0.498
Eukaryotic translation initiation factor 5B	O60841	EIF5B	-1.2	16	47	0.246
Spectrin β chain, erythrocytic	P11277	SPTB	-1.2	7	13	0.558
Syntaxin-7	O15400	STX7	-1.2	11	52	0.598
Myosin light polypeptide 6	P60660	MYL6	-1.2	7	57	0.377
Spermidine synthase	P19623	SRM	-1.2	8	30	0.41
KH domain-containing, RNA-binding, signal transduction-associated protein 1	Q07666; Q5VWX1	KHDRBS1	-1.2	7	34	0.474
Histone H1,5	P16401	HIST1H1B	-1.2	12	74	0.795
Staphylococcal nuclease domain-containing protein 1	Q7KZF4	SND1	-1.2	33	162	0.209
Nucleolar protein 56	O00567	NOP56	-1.2	21	68	0.216
Copine-3	O75131; Q96A23; O95741	CPNE3	-1.2	8	38	0.396
Serine-threonine kinase receptor-associated protein	Q9Y3F4	STRAP	-1.2	8	47	0.173
F-actin-capping protein subunit α-2	P47755	CAPZA2	-1.2	4	11	0.481
Serine/arginine-rich splicing factor 11	Q05519	SRSF11	-1.2	7	29	0.2
26S proteasome non-ATPase regulatory subunit 7	P51665	PSMD7	-1.2	9	30	0.113
La-related protein 1	Q6PKG0	LARP1	-1.2	10	26	0.461
V-type proton ATPase subunit d 1	P61421	ATP6V0D1	-1.2	6	20	0.53
Histone H2B type 1-K; Histone H2B type F-S	O60814; P57053	HIST1H2BK; H2BFS	-1.3	0	1359	0.673
Signal recognition particle subunit SRP72	O76094	01,08,1972	-1.3	19	69	0.782
D-3-phosphoglycerate dehydrogenase	O43175	PHGDH	-1.3	27	182	0.275
General vesicular transport factor p115	O60763	USO1	-1.3	13	34	0.231
GTP-binding nuclear protein Ran	P62826	RAN	-1.3	20	175	0.201
Actin-related protein 2/3 complex subunit 4	P59998	ARPC4	-1.3	4	13	0.608
Integrin α-5; Integrin α-5 heavy chain; Integrin α-5 light chain	P08648	ITGA5	-1.3	11	37	0.729
14-3-3 protein γ; 14-3-3 protein γ, N-terminally processed	P61981	YWHAG	-1.3	6	38	0.673
Actin, cytoplasmic 2; Actin, cytoplasmic 2, N-terminally processed; Actin, cytoplasmic 1; Actin, cytoplasmic 1, N-terminally processed	P63261; P60709; A5A3E0	ACTG1; ACTB	-1.3	9	529	0.053
40S ribosomal protein S17	P08708	RPS17	-1.3	9	72	0.282
Tubulin α-1B chain	P68363	TUBA1B	-1.3	0	209	0.31
26S proteasome non-ATPase regulatory subunit 1	Q99460	PSMD1	-1.3	16	65	0.026
Protein DEK	P35659	DEK	-1.3	6	26	0.354
116 kDa U5 small nuclear ribonucleoprotein component	Q15029	EFTUD2	-1.3	21	71	0.581
Proteasome subunit β type-1	P20618	PSMB1	-1.3	6	15	0.728
Structural maintenance of chromosomes protein 3	Q9UQE7	SMC3	-1.3	13	29	0.703
Myosin-10	P35580	MYH10	-1.3	92	431	0.204
Glutathione S-transferase P	P09211	GSTP1	-1.3	11	93	0.57
NEDD8-conjugating enzyme Ubc12	P61081	UBE2M	-1.3	7	30	0.032
Ferritin light chain	P02792	FTL	-1.3	4	24	0.496
DNA-directed RNA polymerase II subunit RPB2	P30876	POLR2B	-1.3	12	21	0.561
T-complex protein 1 subunitβ	P78371	CCT2	-1.3	33	275	0.293
Ras-related protein Rab-14	P61106	RAB14	-1.3	5	18	0.729
Solute carrier family 2, facilitated glucose transporter member 1	P11166	SLC2A1	-1.3	8	86	0.465
ATP synthase subunit β, mitochondrial	P06576	ATP5B	-1.3	14	87	0.709
Casein kinase II subunit β	P67870	CSNK2B	-1.3	4	35	0.218
Eukaryotic translation initiation factor 2 subunit 1	P05198	EIF2S1	-1.3	9	36	0.267
Spectrin β chain, non-erythrocytic 1	Q01082	SPTBN1	-1.3	30	73	0.239
4F2 cell-surface antigen heavy chain	P08195	SLC3A2	-1.3	36	305	0.372
Plexin-A1	Q9UIW2; P51805	PLXNA1	-1.3	22	69	0.403
Fatty acid synthase; [Acyl-carrier-protein] S-acetyltransferase; [Acyl-carrier-protein] S-malonyltransferase; 3-oxoacyl-[acyl-carrier-protein] synthase; 3-oxoacyl-[acyl-carrier-protein] reductase; 3-hydroxyacyl-[acyl-carrier-protein] dehydratase; Enoyl-[acyl-carrier-protein] reductase; Oleoyl-[acyl-carrier-protein] hydrolase	P49327	FASN	-1.3	92	567	0.412
Thioredoxin-like protein 1	O43396	TXNL1	-1.3	7	40	0.17
Immunoglobulin J chain	P01591	IGJ	-1.3	3	13	0.697
60S ribosomal protein L37a	P61513; A6NKH3	RPL37A	-1.3	5	35	0.374
Ribonucleases P/MRP protein subunit POP1	Q99575	POP1	-1.3	16	49	0.542
60S ribosomal protein L28	P46779	RPL28	-1.3	17	132	0.561
cAMP-dependent protein kinase type I-α regulatory subunit; cAMP-dependent protein kinase type I-α regulatory subunit, N-terminally processed	P10644	PRKAR1A	-1.3	12	73	0.285
Nucleolar RNA helicase 2	Q9NR30	DDX21	-1.3	34	155	0.009
Choline transporter-like protein 2	Q8IWA5	SLC44A2	-1.4	8	21	0.564
ATP-binding cassette sub-family B member 6, mitochondrial	Q9NP58	ABCB6	-1.4	4	22	0.425
40S ribosomal protein S14	P62263	RPS14	-1.4	10	63	0.387
WD repeat-containing protein 46	O15213	WDR46	-1.4	5	9	0.221
Tubulin β-4B chain	P68371	TUBB4B	-1.4	2	350	0.318
Integrin α-V; Integrin α-V heavy chain; Integrin α-V light chain	P06756	ITGAV	-1.4	8	16	0.429
60S ribosomal protein L24	P83731	RPL24	-1.4	12	76	0.426
60S ribosomal protein L13	P26373	RPL13	-1.4	18	127	0.503
Histone H1x	Q92522	H1FX	-1.4	15	51	0.62
Transportin-1	Q92973; O14787	TNPO1	-1.4	8	27	0.384
Cytoplasmic dynein 1 heavy chain 1	Q14204	DYNC1H1	-1.4	116	403	0.47
Core histone macro-H2A,1	O75367; Q9P0M6	H2AFY	-1.4	23	123	0.027
Procollagen-lysine,2-oxoglutarate 5-dioxygenase 1	Q02809	PLOD1	-1.4	13	38	0.66
60S ribosomal protein L31	P62899	RPL31	-1.4	6	28	0.625
Ubiquitin-like modifier-activating enzyme 1	P22314	UBA1	-1.4	32	157	0.069
Serine/arginine-rich splicing factor 3	P84103	SRSF3	-1.4	8	72	0.069
60S ribosomal protein L22	P35268; Q6P5R6	RPL22	-1.4	10	56	0.21
Platelet-activating factor acetylhydrolase IB subunit α	P43034; Q5IS43	PAFAH1B1	-1.4	7	29	0.573
RNA-binding protein 39	Q14498	RBM39	-1.4	10	53	0.147
Proline-, glutamic acid- and leucine-rich protein 1	Q8IZL8	PELP1	-1.4	6	25	0.049
E3 ubiquitin-protein ligase HECTD3	Q5T447	HECTD3	-1.4	6	14	0.245
Solute carrier family 2, facilitated glucose transporter member 3; Solute carrier family 2, facilitated glucose transporter member 14	P11169; Q8TDB8	SLC2A3; SLC2A14	-1.4	5	41	0.427
Syntaxin-12	Q86Y82	STX12	-1.4	6	25	0.172
Gem-associated protein 5	Q8TEQ6	GEMIN5	-1.4	14	38	0.237
Vinculin	P18206	VCL	-1.4	33	110	0.392
Serine--tRNA ligase, cytoplasmic	P49591	SARS	-1.4	26	182	0.178
Phosphatidylinositol 4-kinase type 2-α	Q9BTU6	PI4K2A	-1.4	12	27	0.305
Vascular endothelial growth factor receptor 1	P17948	FLT1	-1.4	11	33	0.593
DNA-directed RNA polymerases I and III subunit RPAC1	O15160	POLR1C	-1.4	6	17	0.128
Sialic acid synthase	Q9NR45	NANS	-1.4	11	40	0.236
Replication protein A 70 kDa DNA-binding subunit; Replication protein A 70 kDa DNA-binding subunit, N-terminally processed	P27694	RPA1	-1.4	8	22	0.274
Regulator of chromosome condensation	P18754	RCC1	-1.4	8	23	0.492
Putative helicase MOV-10	Q9HCE1	MOV10	-1.4	22	50	0.159
H/ACA ribonucleoprotein complex subunit 4	O60832	DKC1	-1.4	15	74	0.377
Monocarboxylate transporter 1	P53985	SLC16A1	-1.4	10	103	0.18
Guanine nucleotide-binding protein G(I)/G(S)/G(T) subunit β-1	P62873; P16520	GNB1	-1.4	9	69	0.135
Actin-related protein 2	P61160	ACTR2	-1.4	7	33	0.464
Dihydropyrimidinase-related protein 2	Q16555; Q14195; Q14194	DPYSL2	-1.4	14	63	0.183
40S ribosomal protein S13	P62277	RPS13	-1.4	16	108	0.187
Actin-related protein 3	P61158; Q9P1U1; Q9C0K3	ACTR3	-1.4	15	74	0.024
60S ribosomal protein L35a	P18077	RPL35A	-1.4	10	42	0.215
Large neutral amino acids transporter small subunit 1	Q01650; Q9UM01	SLC7A5	-1.5	5	32	0.297
Histone H2A type 1-D	P20671	HIST1H2AD	-1.5	0	662	0.582
Poly [ADP-ribose] polymerase 1	P09874	PARP1	-1.5	38	189	0.058
SWI/SNF-related matrix-associated actin-dependent regulator of chromatin subfamily A member 5	O60264; P28370	SMARCA5	-1.5	13	45	0.03
Transformer-2 protein homologβ	P62995	TRA2B	-1.5	7	34	0.471
X-ray repair cross-complementing protein 5	P13010	XRCC5	-1.5	26	152	0.113
Pleckstrin	P08567	PLEK	-1.5	4	17	0.664
Protein ERGIC-53	P49257	LMAN1	-1.5	10	42	0.533
Growth/differentiation factor 15	Q99988	GDF15	-1.5	14	76	0.339
Adenosine kinase	P55263	ADK	-1.5	5	9	0.189
60S ribosomal protein L9	Q5IFJ7; P32969	RPL9	-1.5	7	43	0.355
THO complex subunit 2	Q8NI27	THOC2	-1.5	11	31	0.491
60S ribosomal protein L26	P61254	RPL26	-1.5	5	82	0.197
Lipolysis-stimulated lipoprotein receptor	Q86X29	LSR	-1.5	16	81	0.348
Tyrosine-protein kinase Yes	P07947; P12931	YES1	-1.5	7	50	0.398
Histone H2A,V; Histone H2A,Z	Q71UI9; P0C0S5	H2AFV; H2AFZ	-1.5	8	71	0.102
40S ribosomal protein S3	P23396	RPS3	-1.5	21	103	0.272
Heterogeneous nuclear ribonucleoprotein R	O43390	HNRNPR	-1.5	17	119	0.101
Serine incorporator 1	Q9NRX5	SERINC1	-1.5	3	16	0.039
Uroporphyrinogen decarboxylase	P06132	UROD	-1.5	12	49	0.12
60S ribosomal protein L7a	P62424	RPL7A	-1.5	36	309	0.199
60S ribosomal protein L32	P62910	RPL32	-1.5	8	67	0.111
Lysosome-associated membrane glycoprotein 2	P13473	LAMP2	-1.5	6	28	0.203
Histone H2A type 1-B/E; Histone H2A type 3	P04908; Q7L7L0	HIST1H2AB; HIST3H2A	-1.5	0	72	0.605
Syntaxin-8	Q9UNK0	STX8	-1.5	6	28	0.367
60S ribosomal protein L18a	Q02543	RPL18A	-1.5	10	92	0.22
Myosin-9	P35579; REV__Q9UKV3; P12883; P13535; Q9Y623; P13533; P12882; P11055; Q9UKX2; A7E2Y1	MYH9	-1.5	107	877	0.145
Vesicle-associated membrane protein 7	P51809	VAMP7	-1.5	5	18	0.448
X-ray repair cross-complementing protein 6	P12956	XRCC6	-1.5	33	207	0.103
Aspartate--tRNA ligase, cytoplasmic	P14868	DARS	-1.5	23	107	0.301
40S ribosomal protein S25	P62851	RPS25	-1.5	15	88	0.165
60S ribosomal protein L3	P39023; Q92901	RPL3	-1.5	30	189	0.225
Guanine nucleotide-binding protein subunit β-2-like 1; Guanine nucleotide-binding protein subunit β-2-like 1, N-terminally processed	P63244	GNB2L1	-1.5	14	85	0.512
ADAMTS-like protein 4	Q6UY14	ADAMTSL4	-1.5	24	78	0.274
60S ribosomal protein L34	P49207	RPL34	-1.5	13	77	0.36
Myb-binding protein 1A	Q9BQG0	MYBBP1A	-1.5	18	49	0.005
Serine/threonine-protein phosphatase 2A 65 kDa regulatory subunit A α isoform	P30153; P30154	PPP2R1A	-1.5	14	31	0.089
Band 4,1-like protein 2	O43491	EPB41L2	-1.5	44	334	0.172
T-complex protein 1 subunit γ	P49368	CCT3	-1.5	33	277	0.041
60S ribosomal protein L4	P36578	RPL4	-1.5	39	319	0.198
Nuclease-sensitive element-binding protein 1	P67809; Q9Y2T7	YBX1	-1.6	10	124	0.234
40S ribosomal protein S27-like	Q71UM5	RPS27L	-1.6	1	11	0.298
Asparagine synthetase [glutamine-hydrolyzing]	P08243	ASNS	-1.6	22	83	0.129
Single-stranded DNA-binding protein, mitochondrial	Q04837	SSBP1	-1.6	8	47	0.122
MKI67 FHA domain-interacting nucleolar phosphoprotein	Q9BYG3	NIFK	-1.6	5	24	0.367
RNA-binding protein 25	P49756	RBM25	-1.6	5	16	0.005
Casein kinase II subunit α	P19784	CSNK2A2	-1.6	13	57	0.137
Mannosyl-oligosaccharide 1,2-α-mannosidase IA	P33908	MAN1A1	-1.6	8	57	0.319
Obg-like ATPase 1	Q9NTK5	OLA1	-1.6	10	38	0.307
Adenosylhomocysteinase	P23526	AHCY	-1.6	16	127	0.172
Guanine nucleotide-binding protein G(i) subunit α-2	P04899	GNAI2	-1.6	7	45	0.119
Kinase D-interacting substrate of 220 kDa	Q9ULH0	KIDINS220	-1.6	15	25	0.45
U1 small nuclear ribonucleoprotein 70 kDa	P08621	SNRNP70	-1.6	26	170	0.143
4-trimethylaminobutyraldehyde dehydrogenase	P49189	ALDH9A1	-1.6	9	26	0.049
60S ribosomal protein L18	Q07020	RPL18	-1.6	19	214	0.091
Elongator complex protein 1	O95163	IKBKAP	-1.6	14	35	0.455
Structural maintenance of chromosomes protein 1A	Q14683	SMC1A	-1.6	11	31	0.127
Protein transport protein Sec16A	O15027	SEC16A	-1.6	9	12	0.424
Ras-related protein Rap-1b; Ras-related protein Rap-1b-like protein	P61224; A6NIZ1	RAP1B	-1.6	2	113	0.236
Type-1 angiotensin II receptor-associated protein	Q6RW13	AGTRAP	-1.6	2	23	0.118
Annexin A5	P08758	ANXA5	-1.6	16	89	0.409
Isoleucine--tRNA ligase, cytoplasmic	P41252	IARS	-1.6	37	148	0.349
Serine/arginine-rich splicing factor 1	Q07955	SRSF1	-1.6	13	104	0.062
Small membrane A-kinase anchor protein	Q9BSF0	C2orf88	-1.6	4	12	0.301
Galactokinase	P51570	GALK1	-1.6	9	31	0.069
Exportin-7	Q9UIA9	XPO7	-1.6	12	32	0.052
Histone H2B type 1-J	P06899	HIST1H2BJ	-1.6	0	113	0.33
Ras-related protein Rab-2A	P61019	RAB2A	-1.6	4	30	0.051
S-adenosylmethionine synthase isoform type-1	Q00266	MAT1A	-1.6	3	10	0.167
Cation-dependent mannose-6-phosphate receptor	P20645	M6PR	-1.6	8	30	0.252
40S ribosomal protein S8	P62241	RPS8	-1.6	25	291	0.142
60S ribosomal protein L29	P47914	RPL29	-1.6	9	43	0.287
Cation-independent mannose-6-phosphate receptor	P11717	IGF2R	-1.6	31	88	0.04
Semaphorin-4C	Q9C0C4	SEMA4C	-1.6	10	27	0.429
Sushi, von Willebrand factor type A, EGF and pentraxin domain-containing protein 1	Q4LDE5	SVEP1	-1.6	6	21	0.446
V-type proton ATPase subunit H	Q9UI12	ATP6V1H	-1.6	4	19	0.275
60S ribosomal protein L23a	P62750	RPL23A	-1.6	8	42	0.135
Clathrin light chain A	P09496	CLTA	-1.6	10	79	0.282
40S ribosomal protein S11	P62280	RPS11	-1.6	22	141	0.054
WD repeat-containing protein 1	O75083	WDR1	-1.6	25	128	0.152
Casein kinase II subunit α; Casein kinase II subunit α 3	P68400; Q8NEV1	CSNK2A1; CSNK2A3	-1.6	16	85	0.185
Annexin A6	P08133	ANXA6	-1.6	35	273	0.039
Annexin A4	P09525	ANXA4	-1.7	6	26	0.102
60S ribosomal protein L27	P61353	RPL27	-1.7	10	89	0.057
Serine/threonine-protein kinase TAO3	Q9H2K8	TAOK3	-1.7	10	33	0.159
60S ribosomal protein L10	P27635; Q96L21	RPL10	-1.7	16	79	0.13
Pre-mRNA-processing-splicing factor 8	Q6P2Q9	PRPF8	-1.7	43	133	0.297
Exportin-2	P55060	CSE1L	-1.7	11	62	0.832
40S ribosomal protein S4, X isoform	P62701; P22090; Q8TD47	RPS4X	-1.7	30	183	0.045
T-complex protein 1 subunit η	Q99832	CCT7	-1.7	32	238	0.006
60S ribosomal protein L14	P50914	RPL14	-1.7	13	65	0.235
Fermitin family homolog 3	Q86UX7	FERMT3	-1.7	13	65	0.649
Eukaryotic translation initiation factor 3 subunit L	Q9Y262	EIF3L	-1.7	12	36	0.09
40S ribosomal protein S23	P62266	RPS23	-1.7	15	84	0.124
Sorcin	P30626	SRI	-1.7	8	37	0.003
Glycophorin-A	P02724	GYPA	-1.7	2	16	0.521
Probable rRNA-processing protein EBP2	Q99848	EBNA1BP2	-1.7	6	19	0.022
Clathrin heavy chain 1	Q00610; P53675	CLTC	-1.7	91	781	0.196
40S ribosomal protein S18	P62269	RPS18	-1.7	18	86	0.075
Secretory carrier-associated membrane protein 3	O14828	SCAMP3	-1.7	13	90	0.093
60S ribosomal protein L13a	P40429; Q6NVV1	RPL13A	-1.7	16	134	0.142
Sodium-dependent phosphate transporter 1	Q8WUM9	SLC20A1	-1.7	9	46	0.084
60S ribosomal protein L15	P61313	RPL15	-1.7	21	132	0.162
60S ribosomal protein L8	P62917	RPL8	-1.7	25	166	0.091
T-complex protein 1 subunit ε	P48643	CCT5	-1.7	31	212	0.066
40S ribosomal protein S3a	P61247	RPS3A	-1.7	27	155	0.028
Asparagine--tRNA ligase, cytoplasmic	O43776	NARS	-1.7	18	88	0.157
60S ribosomal protein L35	P42766	RPL35	-1.7	10	65	0.101
Melanoma-associated antigen C1	O60732	MAGEC1	-1.7	2	12	0.266
DNA-dependent protein kinase catalytic subunit	P78527	PRKDC	-1.8	119	538	0.196
Chloride intracellular channel protein 4	Q9Y696	CLIC4	-1.8	8	26	0.195
Serine/arginine-rich splicing factor 7	Q16629	SRSF7	-1.8	5	28	0.142
Lipoprotein lipase	P06858	LPL	-1.8	4	17	0.147
T-complex protein 1 subunit θ	P50990	CCT8	-1.8	35	284	0.005
Xaa-Pro aminopeptidase 1	Q9NQW7	XPNPEP1	-1.8	7	20	0.062
Glutamine--fructose-6-phosphate aminotransferase [isomerizing] 1	Q06210; O94808	GFPT1	-1.8	10	40	0.407
Transthyretin	Q5U7I5; P02766	TTR	-1.8	3	16	0.578
40S ribosomal protein S15	P62841	RPS15	-1.8	2	9	0.235
40S ribosomal protein S27	P42677	RPS27	-1.8	5	34	0.018
Tubulin γ-1 chain; Tubulin γ-2 chain	P23258; Q9NRH3; P23257	TUBG1; TUBG2	-1.8	7	25	0.332
Splicing factor 3B subunit 1	O75533	SF3B1	-1.9	27	117	0.132
Filamin-A	P21333	FLNA	-1.9	109	688	0.017
60S ribosomal protein L6	Q02878	RPL6	-1.9	27	228	0.066
Serine/arginine-rich splicing factor 10	O75494; Q8WXF0	SRSF10	-1.9	5	16	0.155
60S ribosomal protein L5	P46777	RPL5	-1.9	26	202	0.08
Sodium-dependent multivitamin transporter	Q9Y289	SLC5A6	-1.9	4	14	0.136
Niemann-Pick C1 protein	O15118	NPC1	-1.9	4	10	0.263
60S ribosomal protein L17	P18621	RPL17	-1.9	16	134	0.063
Probable E3 ubiquitin-protein ligase HERC1	Q15751	HERC1	-1.9	4	6	0.059
Histone H4	P62805	HIST1H4A	-1.9	20	1134	0.013
Talin-1	Q9Y490; Q9Y4G6	TLN1	-1.9	119	849	0.012
Receptor-type tyrosine-protein phosphatase C	P08575	PTPRC	-1.9	23	60	0.264
40S ribosomal protein S15a	P62244	RPS15A	-1.9	6	23	0.114
Proteasome activator complex subunit 4	Q14997	PSME4	-1.9	10	21	0.197
Pre-mRNA-processing factor 40 homolog A	O75400	PRPF40A	-1.9	8	27	0.077
Asporin	Q9BXN1	ASPN	-1.9	2	9	0.185
Ferritin heavy chain; Ferritin heavy chain, N-terminally processed	P02794	FTH1	-1.9	11	81	0.225
Elongator complex protein 3	Q9H9T3	ELP3	-1.9	16	34	0.113
Ribosomal L1 domain-containing protein 1	O76021	RSL1D1	-1.9	22	103	0.001
T-complex protein 1 subunit δ	P50991	CCT4	-1.9	32	231	0.086
Tubulin α-4A chain	P68366	TUBA4A	-1.9	14	449	0.139
Lupus La protein	P05455	SSB	-1.9	23	121	0.041
Integrin α-6; Integrin α-6 heavy chain; Integrin α-6 light chain; Processed integrin α-6	P23229	ITGA6	-1.9	5	22	0.352
60S ribosomal protein L27a	P46776	RPL27A	-1.9	14	94	0.098
Exostosin-1	Q16394	EXT1	-2	8	25	0.21
Glycophorin-C	P04921	GYPC	-2	2	30	0.363
Metalloreductase STEAP3	Q658P3	STEAP3	-2	5	13	0.12
Vesicle-trafficking protein SEC22b	O75396	SEC22B	-2	3	15	0.445
60S ribosomal protein L19	P84098	RPL19	-2	11	88	0.05
T-complex protein 1 subunit α	P17987	TCP1	-2	33	229	0.016
LIM and senescent cell antigen-like-containing domain protein 1; LIM and senescent cell antigen-like-containing domain protein 2	P48059; Q7Z4I7	LIMS1; LIMS2	-2	8	51	0.094
60S ribosomal protein L7	P18124	RPL7	-2	25	187	0.026
Fibronectin; Anastellin; Ugl-Y1; Ugl-Y2; Ugl-Y3	P02751	FN1	-2	68	362	0.148
Histone H3,3; Histone H3,3C	P84243; Q6NXT2; P0DPK2; P0DPK5	H3F3A; H3F3C	-2	1	305	0.229
Betaine--homocysteine S-methyltransferase 1; S-methylmethionine--homocysteine S-methyltransferase BHMT2	Q93088; Q9H2M3	BHMT; BHMT2	-2	6	42	0.074
40S ribosomal protein S26; Putative 40S ribosomal protein S26-like 1	P62854; Q5JNZ5	RPS26; RPS26P11	-2	9	66	0.134
40S ribosomal protein S6	P62753	RPS6	-2.1	23	105	0.081
Olfactomedin-like protein 3	Q9NRN5	OLFML3	-2.1	7	21	0.316
Dihydrolipoyllysine-residue acetyltransferase component of pyruvate dehydrogenase complex, mitochondrial	P10515	DLAT	-2.1	9	43	0.056
T-complex protein 1 subunit ζ	P40227	CCT6A	-2.1	26	208	0.043
Collagen α-1(XVIII) chain; Endostatin	P39060	COL18A1	-2.1	35	463	0.121
Small nuclear ribonucleoprotein Sm D1	P62314	SNRPD1	-2.1	6	39	0.216
THO complex subunit 1	Q96FV9	THOC1	-2.1	8	19	0.021
1-phosphatidylinositol 4,5-bisphosphate phosphodiesterase γ-2	P16885	PLCG2	-2.1	5	13	0.051
Transforming growth factorβ-1-induced transcript 1 protein	O43294	TGFB1I1	-2.1	5	28	0.051
Extracellular matrix protein 1	Q16610	ECM1	-2.1	3	8	0.021
DNA topoisomerase 1	P11387; Q969P6	TOP1	-2.1	18	102	0.029
Dihydrolipoyllysine-residue succinyltransferase component of 2-oxoglutarate dehydrogenase complex, mitochondrial	P36957	DLST	-2.1	5	23	0.179
Transmembrane protein 106B	Q9NUM4	TMEM106B	-2.1	3	15	0.022
40S ribosomal protein S2	P15880	RPS2	-2.2	20	146	0.077
Sortilin	Q99523	SORT1	-2.2	8	22	0.053
Ras-related protein Ral-B	P11234	RALB	-2.2	5	30	0.165
N-α-acetyltransferase 15, NatA auxiliary subunit	Q9BXJ9; Q6N069	NAA15	-2.2	21	53	0.081
Tax1-binding protein 1	Q86VP1	TAX1BP1	-2.2	6	12	0.013
40S ribosomal protein S9	P46781	RPS9	-2.2	23	153	0.097
Neutral amino acid transporter A	P43007	SLC1A4	-2.3	8	51	0.144
C-type lectin domain family 11 member A	Q9Y240	CLEC11A	-2.3	4	17	0.188
V-type proton ATPase subunit D	Q9Y5K8	ATP6V1D	-2.3	8	26	0.046
Splicing factor 3B subunit 3	Q15393	SF3B3	-2.3	21	58	0.01
Phosphoribosyl pyrophosphate synthase-associated protein 1	Q14558	PRPSAP1	-2.3	4	11	0.03
Plakophilin-3	Q9Y446	PKP3	-2.3	16	41	0.031
Transforming growth factor-β-induced protein ig-h3	Q15582	TGFBI	-2.4	5	17	0.018
Inhibin β E chain	P58166	INHBE	-2.4	8	33	0.008
40S ribosomal protein S16	P62249	RPS16	-2.4	11	116	0.059
60S ribosomal protein L36a-like	Q969Q0	RPL36AL	-2.4	3	25	0.127
Collagen α-1(VI) chain	P12109	COL6A1	-2.4	9	52	0.094
Sulfhydryl oxidase 1	O00391	QSOX1	-2.4	4	22	0.116
Tissue factor pathway inhibitor	P10646	TFPI	-2.4	11	67	0.113
AMP deaminase 2	Q01433	AMPD2	-2.5	5	15	0.012
Deleted in malignant brain tumors 1 protein	Q9UGM3	DMBT1	-2.5	1	16	0.01
Copper-transporting ATPase 1	Q04656	ATP7A	-2.5	11	26	0.031
Cytoplasmic aconitate hydratase	P21399	ACO1	-2.6	15	52	0.069
Collagen α-1(IV) chain; Arresten; Collagen α-5(IV) chain	P02462; P29400	COL4A1; COL4A5	-2.6	4	23	0.08
Basement membrane-specific heparan sulfate proteoglycan core protein; Endorepellin; LG3 peptide	P98160	HSPG2	-2.6	178	1394	0.108
Barrier-to-autointegration factor; Barrier-to-autointegration factor, N-terminally processed	O75531	BANF1	-2.6	9	34	0.209
Four and a half LIM domains protein 1	Q13642	FHL1	-2.6	3	20	0.104
Dynamin-1-like protein	O00429	DNM1L	-2.7	15	41	0.12
Bisphosphoglycerate mutase	P07738	BPGM	-2.7	7	24	0.021
Collagen α-3(VI) chain	P12111	COL6A3	-2.7	15	39	0.269
DNA topoisomerase 2-β	Q02880	TOP2B	-2.8	7	23	0.002
Echinoderm microtubule-associated protein-like 2	O95834	EML2	-3	9	43	0.156
Integrin-linked protein kinase	Q13418	ILK	-3	15	63	0.16
Mannan-binding lectin serine protease 1; Mannan-binding lectin serine protease 1 heavy chain; Mannan-binding lectin serine protease 1 light chain	P48740	MASP1	-3	3	12	0.228
E3 ubiquitin-protein ligase UBR4	Q5T4S7	UBR4	-3	37	85	0.102
Phosphatidylinositol 5-phosphate 4-kinase type-2 α	P48426	PIP4K2A	-3	6	45	0.013
Cysteine and glycine-rich protein 1	P21291	CSRP1	-3.1	4	21	0.186
Agrin; Agrin N-terminal 110 kDa subunit; Agrin C-terminal 110 kDa subunit; Agrin C-terminal 90 kDa fragment; Agrin C-terminal 22 kDa fragment	O00468	AGRN	-3.1	75	551	0.008
Glycogen phosphorylase, liver form	P06737	PYGL	-3.2	16	78	0.12
Coagulation factor XIII A chain	P00488; P16452	F13A1	-3.2	5	21	0.275
Coronin-1A	P31146	CORO1A	-3.2	8	36	0.079
Vesicle-associated membrane protein 3; Vesicle-associated membrane protein 2; Vesicle-associated membrane protein 1	Q15836; P63027; P23763	VAMP3; VAMP2; VAMP1	-3.3	4	22	0.011
Thrombospondin-4	P35443	THBS4	-3.3	7	51	0.042
Apolipoprotein E	P02649	APOE	-3.4	27	184	0.005
Prolow-density lipoprotein receptor-related protein 1; Low-density lipoprotein receptor-related protein 1 85 kDa subunit; Low-density lipoprotein receptor-related protein 1 515 kDa subunit; Low-density lipoprotein receptor-related protein 1 intracellular domain	Q07954	LRP1	-3.7	41	108	0.157
Tyrosine-protein kinase receptor UFO	P30530	AXL	-3.8	7	21	0.002
Apolipoprotein B-100; Apolipoprotein B-48	P04114	APOB	-3.9	7	18	0.116
Microtubule-associated protein RP/EB family member 2	Q15555	MAPRE2	-3.9	11	71	0.097
Choline transporter-like protein 1	Q8WWI5	SLC44A1	-4.1	7	15	0.029
HLA class I histocompatibility antigen, α chain G	P17693	HLA-G	-4.2	3	22	0.018
Integrin β-3	P05106	ITGB3	-4.3	18	108	0.116
Laminin subunit α-5	O15230	LAMA5	-4.3	65	250	0.007
Tripeptidyl-peptidase 2	P29144	TPP2	-4.4	57	211	0.003
Epidermal growth factor-like protein 7	Q9UHF1	EGFL7	-4.5	4	10	0.002
Bone marrow stromal antigen 2	Q10589	BST2	-4.5	6	17	0.003
Laminin subunit γ-1	P11047	LAMC1	-5.1	36	174	0.007
Hyaluronan-binding protein 2; Hyaluronan-binding protein 2 50 kDa heavy chain; Hyaluronan-binding protein 2 50 kDa heavy chain alternate form; Hyaluronan-binding protein 2 27 kDa light chain; Hyaluronan-binding protein 2 27 kDa light chain alternate form	Q14520	HABP2	-5.1	5	25	0.024
Plasma α-L-fucosidase	Q9BTY2	FUCA2	-5.2	3	8	0.013
Galectin-3-binding protein	Q08380	LGALS3BP	-5.9	6	17	<0.001
Laminin subunitβ-1	P07942	LAMB1	-6.3	37	97	0.007
Collagen α-1(XV) chain	P39059	COL15A1	-7.9	15	102	0.002
Netrin-1	O95631; O00634	NTN1	-12.1	11	28	0.01
